# Supplementary material
Source: PubMed Central journal article supplement (PMC4558695)
Supplement: supp_tpc.115.136150_tpc136150_SupplementalData.pdf [file supp_tpc.115.136150_tpc136150_SupplementalData.pdf]

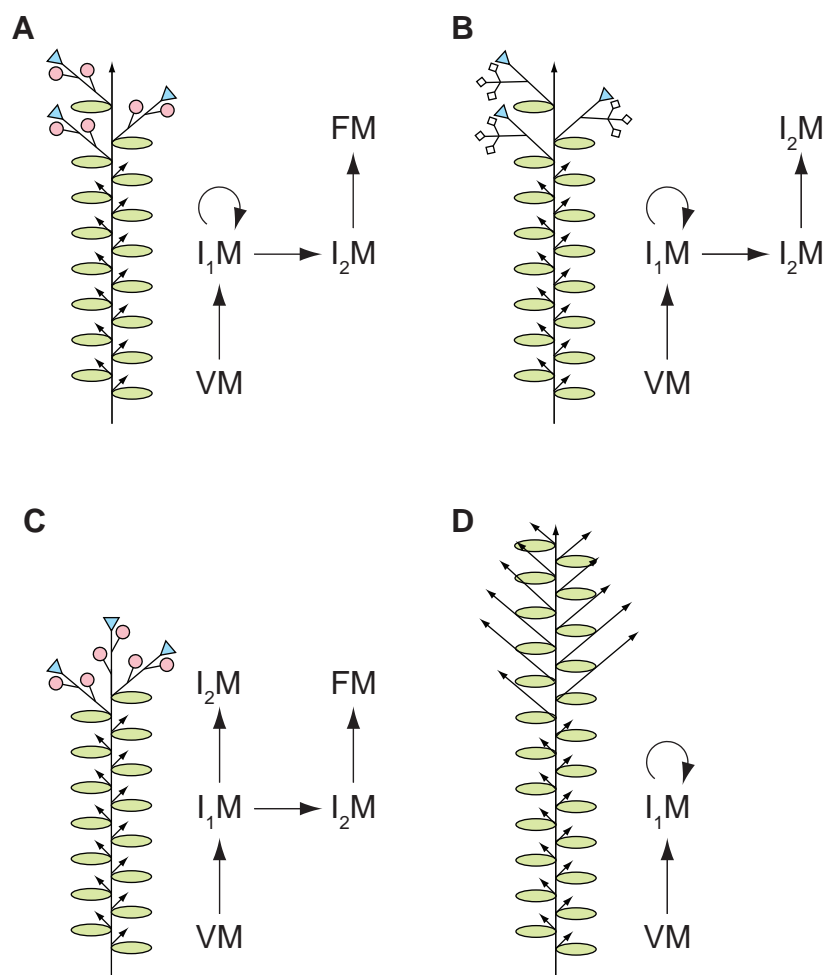

### Supplemental Figure 1: Phenotypes for key inflorescence mutants in pea.

This figure summarises the main phenotypic features of key pea mutants described in the introduction of this study. For each mutant, a diagram of inflorescence architecture (left), and schematic of the meristem transitions involved (right) are shown for the most severe mutant allele described.

**(A)** Wild-type.

**(B)** The *pim* mutant, which bears proliferating secondary inflorescences ( $I_2$ s) in the place of single flowers. After one or more iterations of  $I_2$  structures, flowers are borne, usually with abnormal morphology (Taylor et al., 2002).

**(C)** The *det* mutant, which exhibits termination of the main stem in an ectopic  $I_2$  (Singer et al., 1990).

**(E)** The *veg1* and *gigas* mutants, which share a non-flowering phenotype with aerial branching under LD conditions (Beveridge and Murfet, 1996; Berbel et al., 2012).

In diagrams, arrows indicate the potential for indeterminate growth, green ovals are leaves, pink circles are flowers and blue triangles are stubs terminating each secondary inflorescence ( $I_2$ ) axis. In schematics, straight arrows indicate meristem transitions and products, and circular arrows indicate meristem indeterminacy. Meristem abbreviations are as follows: vegetative meristem (VM), primary inflorescence meristem ( $I_1$ M), secondary inflorescence meristem ( $I_2$ M), floral meristem (FM).

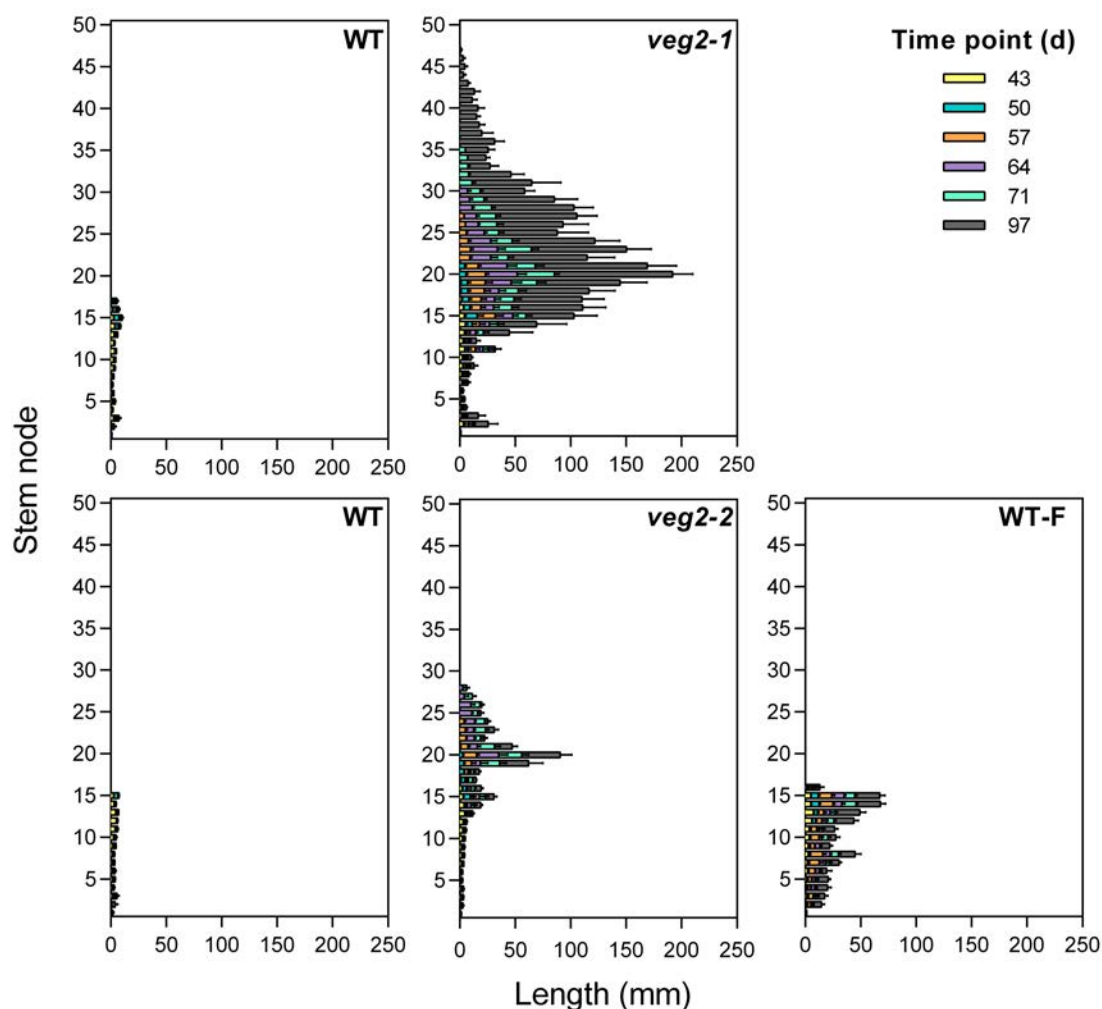

### Supplemental Figure 2: Branching in the *veg2* mutants.

Characterisation of branch outgrowth throughout development for intact *veg2-1* and *veg2-2* mutant plants, and their associated wild-type (WT) lines (siblings of *veg2-1*, and line NGB5839, respectively), and deflowered wild-type plants (WT-F: line NGB5839, each flower removed after anthesis). Increase in length of the main lateral branch at each node was calculated from measurements taken at five weekly time points during development (43-71 days after sowing) and a final time point when wild-type plants were senescing (97 days after sowing). Stem node is shown on the y-axis and branch length on the x-axis to represent an upright plant with lateral branches. Branch length is not shown for reproductive nodes in wild-type and *veg2-2* plants as an  $I_2$  was present as the main lateral structure at these nodes. Mean values  $\pm$  standard error are shown for  $n = 5$  to 6 plants grown in LD (24 light), from the same experiment shown in Figure 2C.

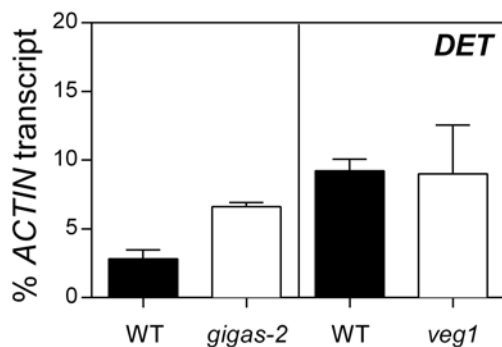

**Supplemental Figure 3: *DET* expression in non-flowering *gigas* and *veg1* mutants.**

Relative expression of *DET* transcript as a marker of primary inflorescence ( $I_1$ ) identity in dissected shoot apices during early floral development in wild-type (WT; line NGB5839 or wild-type sibling of *veg1*), 45 days after sowing under LD (18 light/6 dark) conditions, in the same experiment shown in Figures 2E and 6B. Note that expression of *DET* at levels equal to or higher than wild-type indicate acquisition of  $I_1$  identity has occurred prior to this time point, similar to wild-type. Mean  $\pm$  standard error are shown for  $n = 2$  to 3 biological replicates. For more detailed resolution of *DET* expression in these mutants, please refer to Hecht et al. (2011) and Berbel et al. (2012).

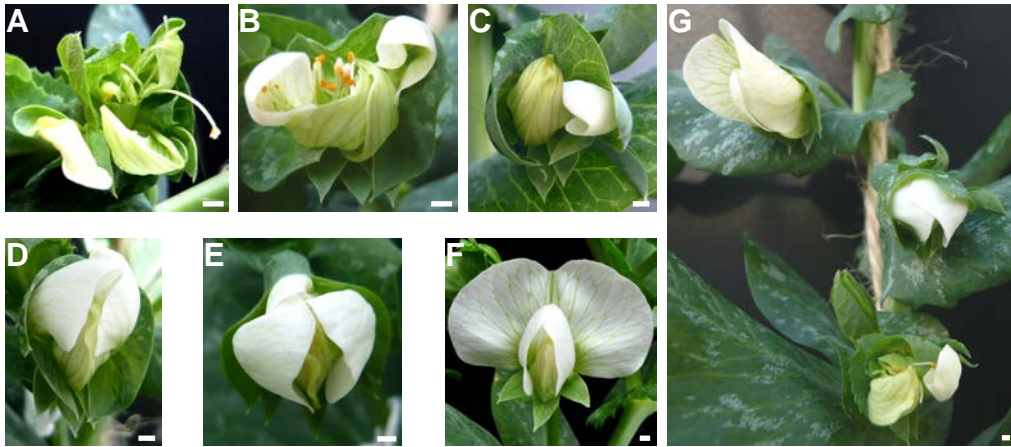

**Supplemental Figure 4: Floral morphology in the *veg2-2* mutant.**

**(A-F)** Examples of flowers exhibiting the range in severity of floral morphology defects observed in *veg2-2* mutant plants. Flowers range from **(A)** those defective in all whorls to **(F)** flowers with wild-type morphology.

**(G)** Photo of a *veg2-2* mutant plant exhibiting decreasing floral defects with increased reproductive node. Scale bars indicate 1mm.

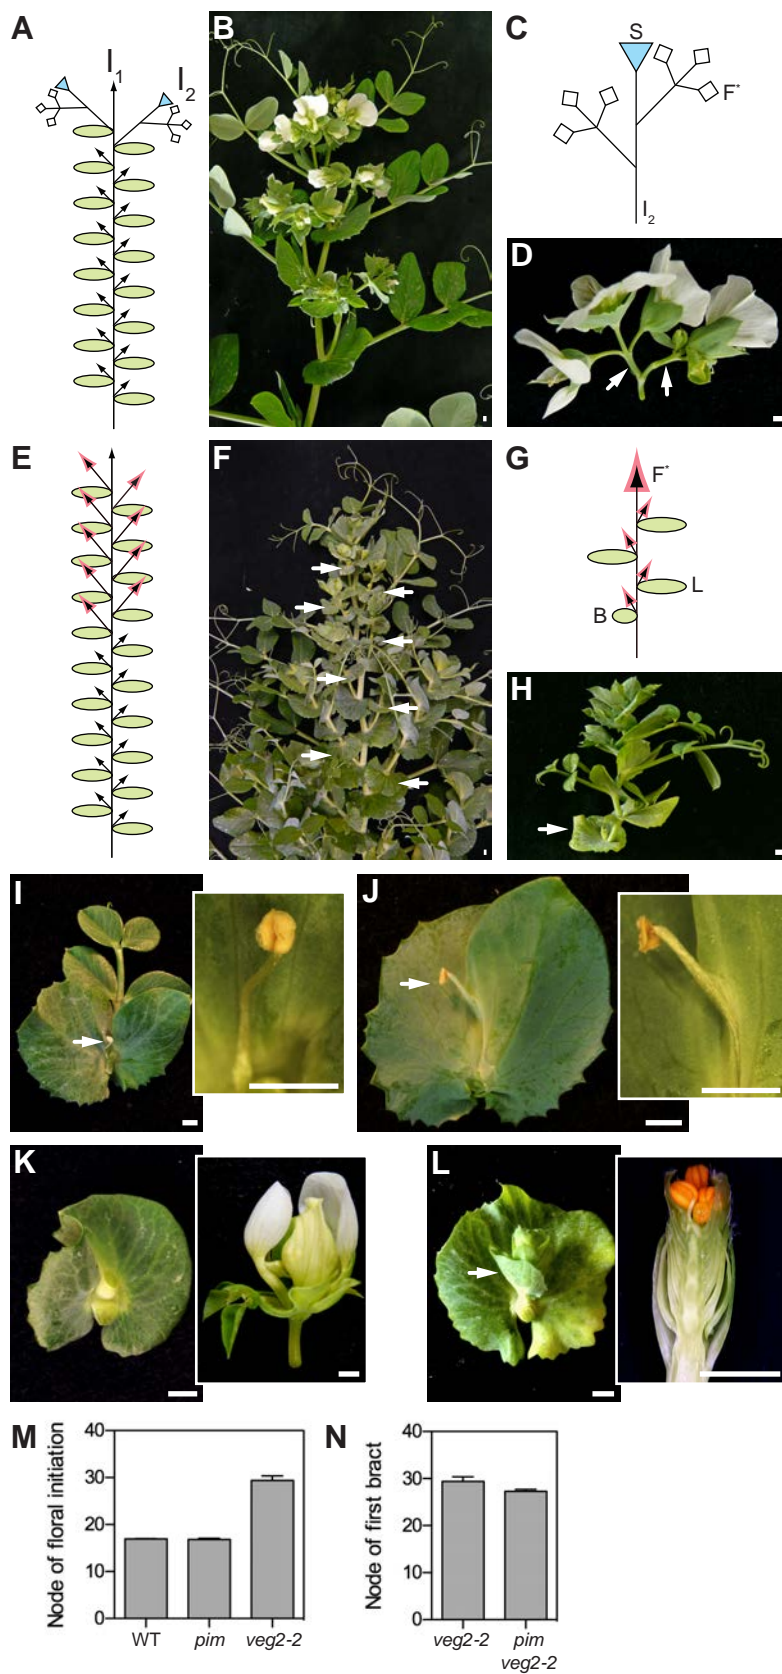

Supplemental Figure 5: The *pim-2 veg2-2* double mutant phenotype. Legend over page.

**Supplemental Figure 5: The *pim-2 veg2-2* double mutant phenotype.**

**(A-D)** The *pim-2* single mutant. **(A)** Diagram of the *pim* stem. **(B)** Photograph of aerial stem nodes. **(C)** Diagram and **(D)** photograph of the *pim* secondary inflorescence ( $I_2$ ) with normal  $I_2$  morphology but groups of proliferating abnormal  $I_2$  structures borne in place of single flowers. Arrows indicate where the pedicel of a single flower would be in wild-type.

**(E-J)** The *pim-2 veg2-2* double mutant. **(E)** Diagram of the *pim veg2-2* stem. **(F)** Photograph of aerial stem nodes. Branches that had a bract present instead of a leaf at the first branch node (arrows in **F**) developed instead of  $I_2$  structures at aerial nodes. The presence of a bract made these branches distinct from vegetative branches at lower nodes, but reminiscent of the ' $I_2$ ' structures in *veg2-2*, which have a bract subtending each flower. Once initiated, these branches were present at every subsequent aerial node, as is seen for  $I_2$  structures in wild-type pea. *pim veg2-2* plants lacked recognisable flowers, but eventually produced floral organs at upper nodes on branches and/or the main stem. **(G)** Diagram and **(H)** photograph of a branch borne on the main stem of the *pim veg2-2* double mutant, which had a bract (B) at the first node (arrow in **H**), leaves (L) at subsequent nodes, and showed acquisition of partial floral identity at later nodes. **(I)** Leaf dissected from an upper node of a branch that acquired partial floral identity, with an axillary stamen (arrow; inset at higher magnification). **(J)** A reduced leaf (back) dissected from an upper branch node, with a stamen (arrow; inset at higher magnification) fused to the leaf in place of a rachis.

**(K-L)** Bracts and associated axillary structures in *veg2-2* and *veg2-2 pim*. **(K)** Bract dissected from a *veg2-2* ' $I_2$ ', where the bract subtended an axillary flower (removed for clarity and shown inset only). **(L)** Bract dissected from a *veg2-2 pim* aerial branch, shown subtending an axillary bud which also had a bract at the first node (arrow), and eventually acquired partial floral identity (stamens visible in dissected bud, inset).

**(M-N)** Comparison of **(M)** node of floral initiation in wild-type (WT), *pim* and *veg2-2* single mutants, and **(N)** node of first axillary structure borne from the main stem bearing a bract instead of a leaf at the first node. In *veg2-2* the node of floral initiation is the same as the node of first bract, as *veg2-2*  $I_2$  structures have bracts subtending each flower. Values represent mean  $\pm$  standard error for  $n = 11-14$  plants per genotype.

In diagrams, arrows indicate the potential for indeterminate growth, pink arrows indicate the acquisition of partial floral identity, white squares are abnormal flowers (F\*), blue triangles are terminal stubs (S), and green ovals are leaves (L) or bracts (B).

Scale bars in photographs indicate 2mm.

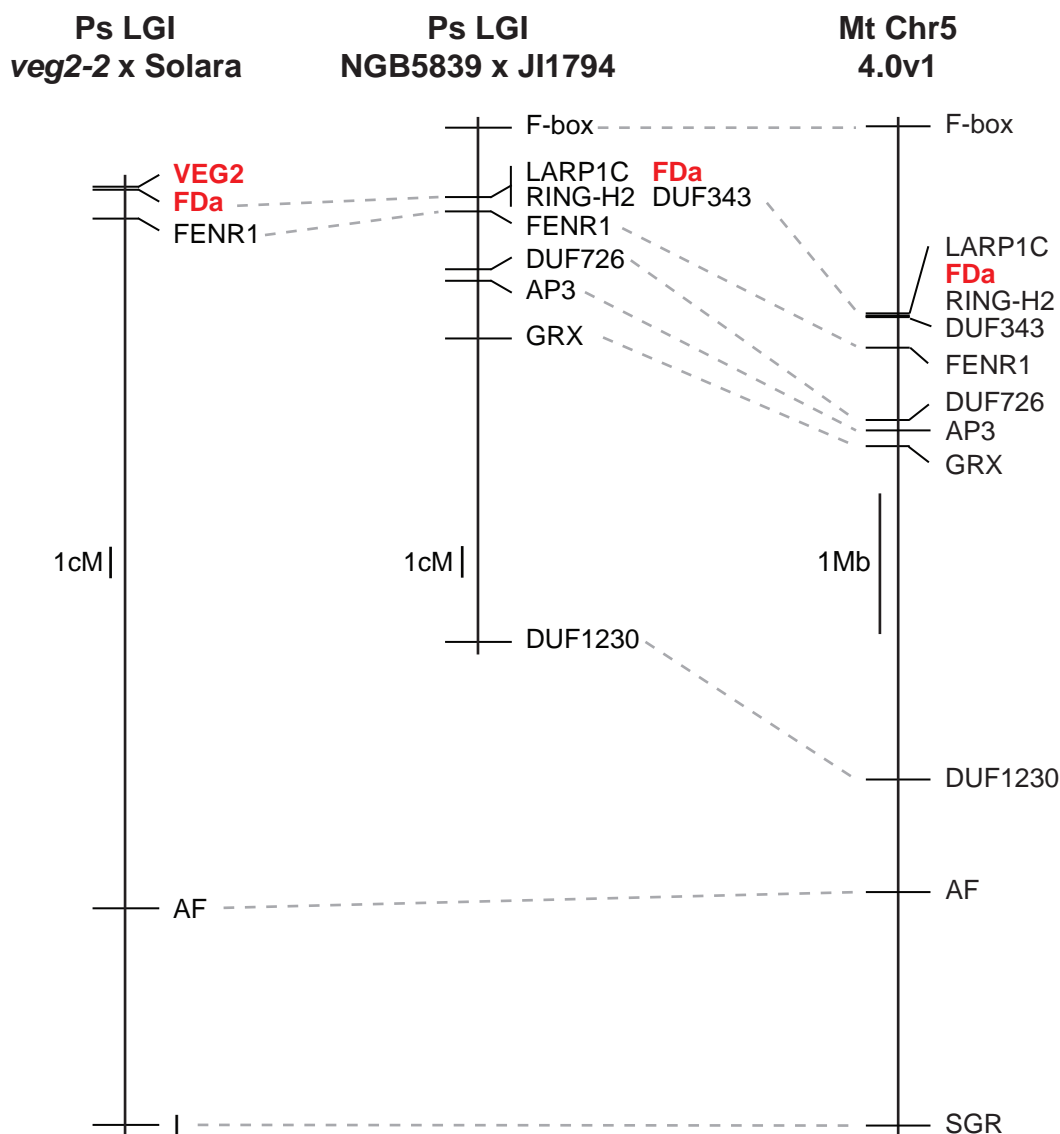

**Supplemental Figure 6: Comparative map for pea and Medicago showing relative locations of *VEG2/FDa* and surrounding genes.**

Corresponding genes are linked between pea linkage group I (Ps LGI) and Medicago chromosome 5 (Mt Chr5) by dashed lines. For pea, distances were estimated from the segregation data of two  $F_2$  populations from crosses between *veg2-2* and Solara (114 plants), and NGB5839 and JI1794 (92 plants), using JoinMap software (v4; Kyazma B.V., Wageningen, Netherlands). There were no recombination events between *FDa* and *VEG2*, using a marker for *FDa* based on the G536A SNP (Figure 4), which co-segregated perfectly with *veg2-2* phenotype. Full details for markers and corresponding Medicago genes are given in Supplemental Table 1.

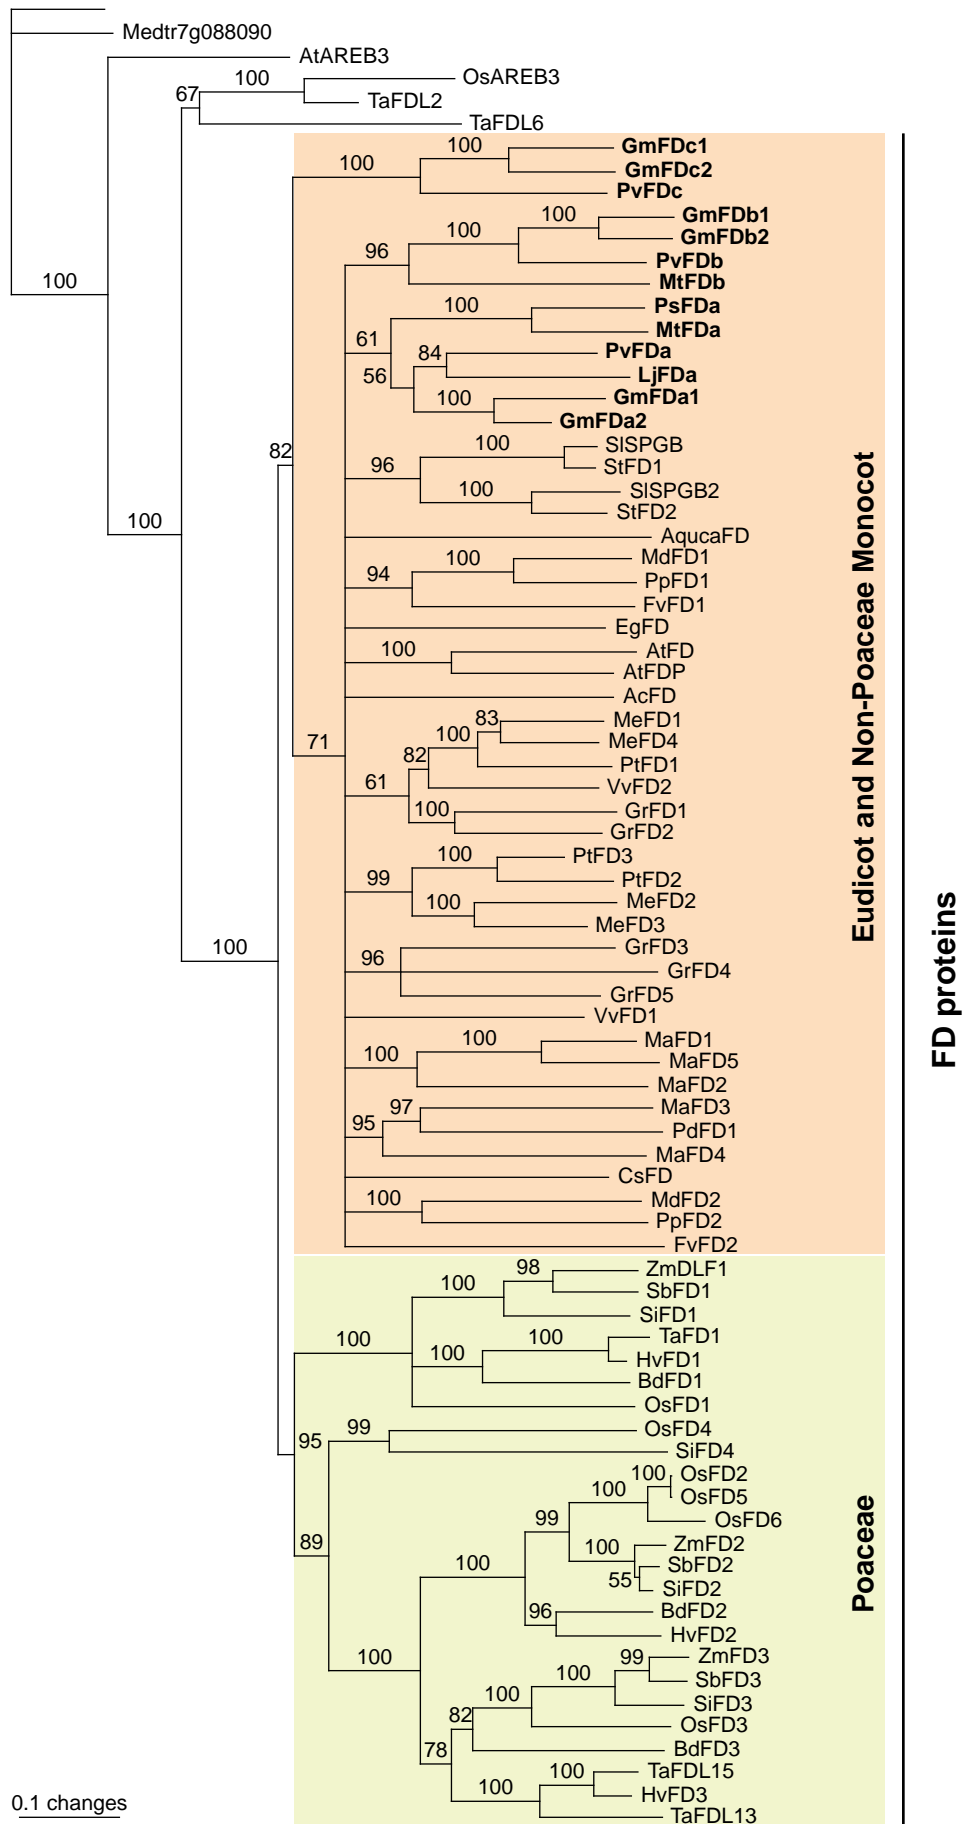

Supplemental Figure 7: Phylogram of the angiosperm FD family. Legend over page.



**Supplemental Figure 7: Phylogram of the angiosperm FD family.**

Phylogram of FD proteins from diverse eudicot and monocot species. Proteins previously identified as FD-like that fall outside the core FD family (GmFDL19, Medtr7g088090, TaFDL2 and TaFDL6; Li and Dubcovsky, 2008; Pierre et al., 2008; Nan et al., 2014) and other related group A bZIP proteins (AtAREB3 and OsAREB3) are also included. Alternative names for previously identified soybean proteins GmFDL02 (GmFDb1), GmFDL04 (GmFDc1) and GmFDL0602 (GmFDc2) are adopted to better reflect wider phylogenetic relationships. Bootstrap values obtained from 10,000 trees are indicated as a percentage above each branch. Branches with bootstrap values <55% have been collapsed. Legume FD proteins are shown in bold. The analysis is based on the sequence alignment shown in Supplemental Dataset 2. Sequence details and species abbreviations are given in Supplemental Table 2.

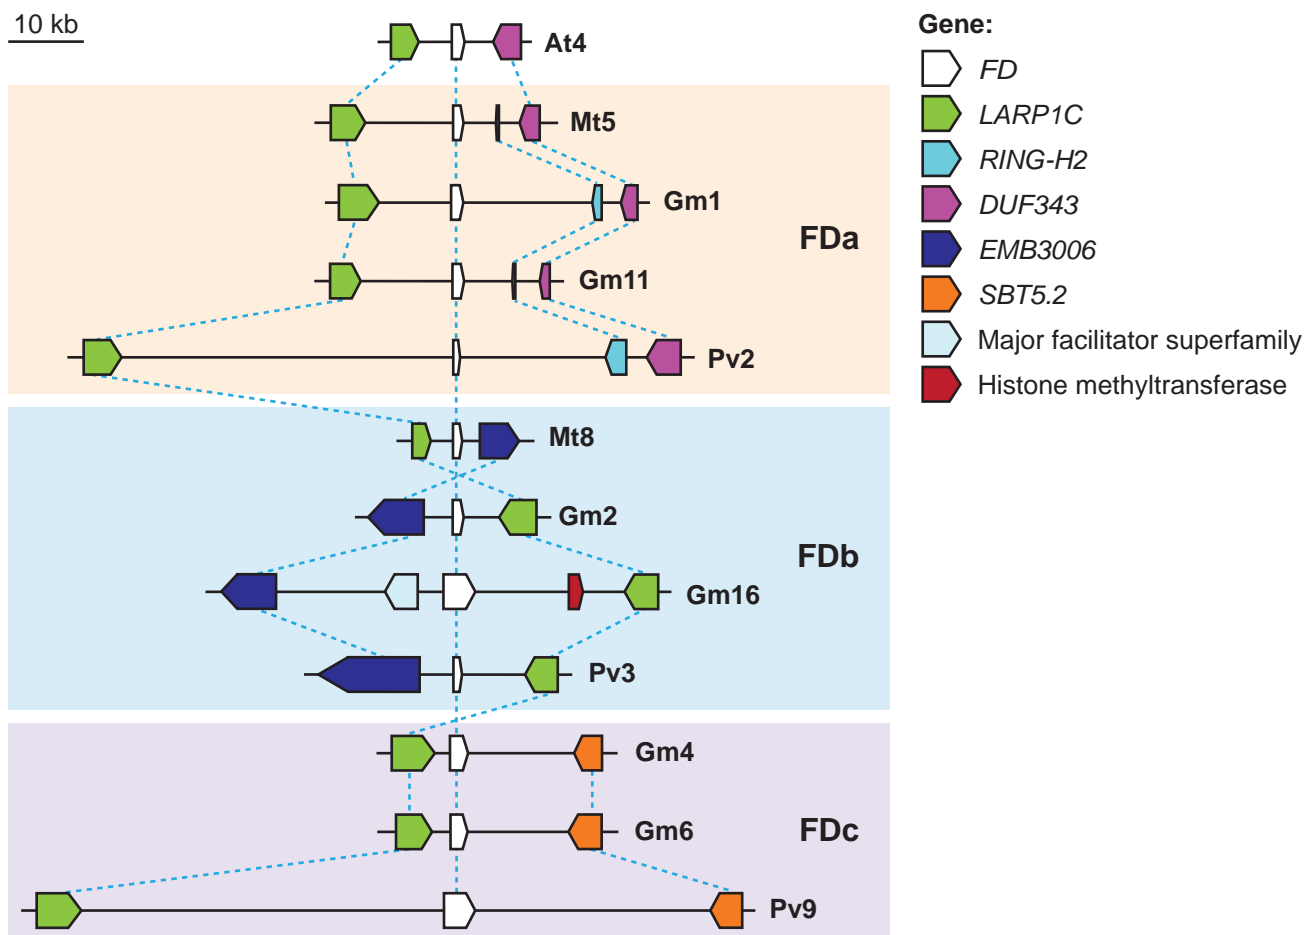

**Supplemental Figure 8: Microsynteny between genomic regions containing *FD* and flanking genes in *Arabidopsis* and legume species.**

The genes flanking *FD* in *Arabidopsis* (At), and legume *FDa*, *FDb*, and *FDC* genes in *Medicago* (Mt), common bean (Pv) and soybean (Gm) are shown. Genes are represented as boxes with point showing putative direction of transcription. Gene details are given in Supplemental Table 4. Chromosome number is indicated for each species. Between species, corresponding genes are connected by dashed lines.

**Supplemental Figure 9: Conserved nature of the amino acid altered by the *veg2-2* SNP.**

**(A)** Alignment of predicted protein sequence for the bZIP domain showing conservation of the arginine altered in the *veg2-2* mutant between FD proteins from diverse eudicot species (Ac, Kiwifruit; Aquca, Aquilegia; At, Arabidopsis; Cs, Cucumber; Eg, Eucalyptus; Fv, Strawberry; Gr, Cotton; Md, Apple; Me, Cassava; Pp, Peach; Pt, Poplar; Sl, Tomato; Vv, Grape) and monocot species (Bd, Brachypodium; Hv, Barley; Ma, Banana; Os, Rice; Pd, Date palm; Sb, Sorghum; Si, Foxtail millet; Ta, Wheat; Zm, Maize).

**(B)** Alignment of the bZIP domain and surrounding region for all Arabidopsis bZIP family proteins, illustrating conservation of the arginine altered in the pea *veg2-2* mutant (arrow). Letters in parenthesis indicate group of bZIP protein as defined by Corrêa (2008).

Shading in alignments indicates degree of conservation: black = 100%, dark grey = 80%, light grey = 60%. Sequence details are given in Supplemental Table 2.

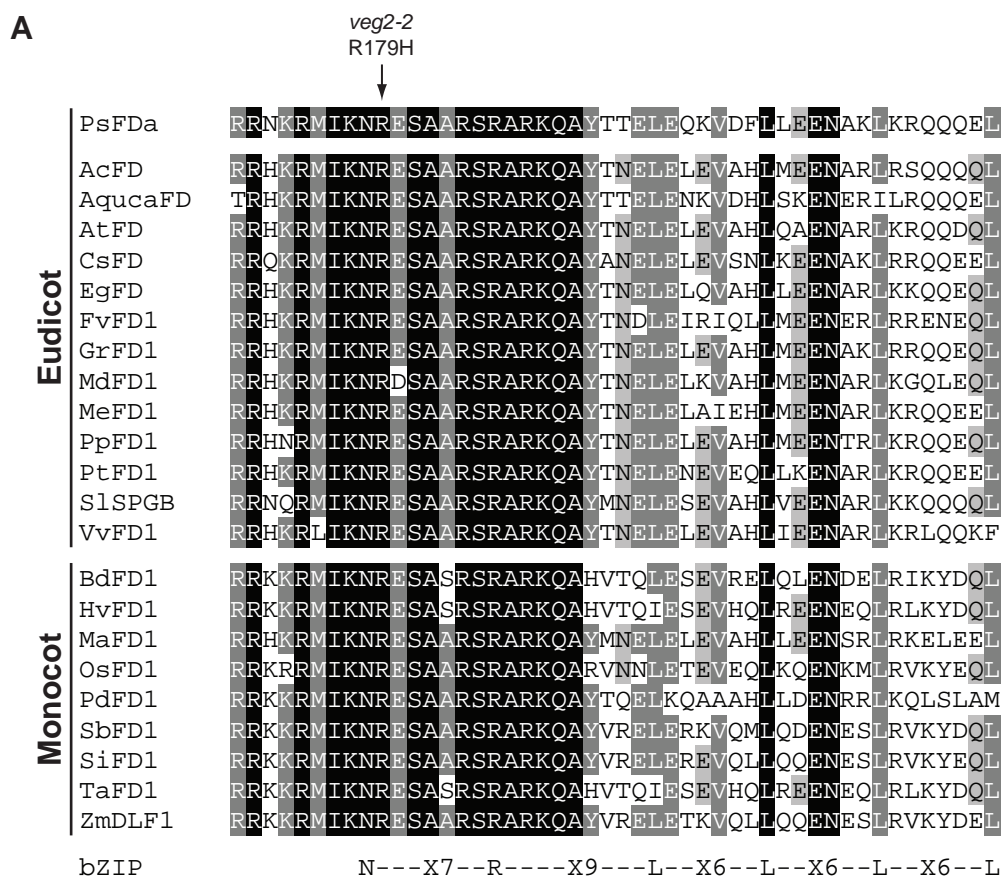

**B**

↓

```

AtFD      (A) GNRHRKRMIKNRESAARSRARKQAYTNEELEVVAHQAEENARLKR
AtFDP     (A) GDRRYKRMIKNRESAARSRARKQAYTNEELEIAHQTENARLKI
AtABF1    (A) VERRQKRMIKNRESAARSRARKQAYTLEEAETESKLVNQDLQK
AtABF2    (A) VERRQKRMIKNRESAARSRARKQAYTVEEAFAVAKKEENDELQR
AtABF3    (A) IERRQKRMIKNRESAARSRARKQAYTMEEAETIAQLKELNEELQK
AtABF4    (A) IERRQKRMIKNRESAARSRARKQAYTLEEAETEKKKTNQQLQK
AtABI5    (A) VERRQKRMIKNRESAARSRARKQAYTVEEAELNQLKEENAQLKH
AtAREB3   (A) VERRQKRMIKNRESAARSRARKQAYTHEEIKVSRTEENERLKR
AtbZIP13  (A) AAQRQRMIKNNRESAARSRERKQAYQVEEALAAKTEENELLSK
AtbZIP15  (A) VDKKLRKIKNRESAARSRARKQAYTMEVEVELENLKDYEEELK
AtDPBF2   (A) MERRQRMIKNNRESAARSRARQAYTVEEELNNTTEENTKQKE
AtDPBF4   (A) VERRQKRMIKNRESAARSRARKQAYTHEEIKVSRTEENELRRR
AtGBF4    (A) AAQRQRMIKNNRESAARSRERKQAYQVEEETLAAKTEENELLSK
AtbZIP17  (B) DEKKRARLMLNRESAQLSRQRKHYVEELEEKVRNMHSTITDNG
AtbZIP28  (B) DKRKLIRQIRNRESAQLSRLRKKQQTTEEERKVKSMNATIAELNG
AtbZIP49  (B) EKKNVRLVLRNRESAHLSRQRKHYVEELEDKVKNMHSTISELSS
AtbZIP9   (C) DLKRIREFMNSNRESAKRSRRRQOYLVDEETQVDSLKGDNSTLYK
AtbZIP25  (C) DVKRARRMLSNRESARRSRRRQEQMNEFDTQVQGLRAEHSTLIN
AtBZO2H1  (C) DVKKSRRMLSNRESARRSRRRQEQTSDLEETQVNDLKEGHSLLK
AtBZO2H3  (C) NVKRVKMLSNRESARRSRRRQAHLSEETQVSQLRVENSKLKMK
AtAHPB1B  (D) DQKTLRRLAQNREAAARKSRLRKKAYVQVEENSRLKLTQLEQELQR
AtbZIP21  (D) DAKTLRRLAQNREAAARKSRLRKKAYVQVEESSRIKLSQLEQELQR
AtbZIP50  (D) HDKMKRRLAQNREAAARKSRLRKKAYVQVEESRLKLSQLEQELK
AtbZIP65  (D) DPKTLRRLAQNREAAARKSRLRKKAYVQVEESCRKLTQLEQEIQR
AtOBF     (D) DQKTLRRLAQNREAAARKSRLRKKAYVQVEENSRLKLTQLEQELQR
AtPAN     (D) DQRTLRLAQNREAAARKSRLRKKAYVQVEENSRIRLAQLEELKR
AtTGA1    (D) PDKIQRRLAQNREAAARKSRLRKKAYVQVEETSRLKLTQLEQELDR
AtTGA3    (D) NDKMKRRLAQNREAAARKSRLRKKAHVQVEESRLKLSQLEQELVR
AtTGA4    (D) PDKIQRRLAQNREAAARKSRLRKKAYVQVEETSRLKLTQLEQELDR
AtTGA6    (D) DQKTLRRLAQNREAAARKSRLRKKAYVQVEENSRLKLTQLEQELQR
AtbZIP34  (E) DPKRVKRIILANRQSAQRSRVRKLYISEERSVTSLQAEVSVLSP
AtbZIP61  (E) DPKRVKRIILANRQSAQRSRVRKLYISEERSVTSLQTEVSVLSP
AtbZIP19  (F) GKKGEKPLGNREAVRKYREKAKAASLEDEVARLAVNQDLVK
AtbZIP23  (F) ESSGKRRPLGNREAVRKYREKAKAASLEDEVMLKAVNNQLK
AtbZIP24  (F) DSSNKRLCCNREAVRKYREKAKARTAYLEDEVMLQSLNEQFLR
AtbZIP16  (G) ELKRQRKQSNRESARRSRLRQAECEDEAQRAEVLEENENTNRA
AtbZIP68  (G) EIKRQRKQSNRESARRSRLRQAECEDEAQRAEVLENGENSSRA
AtGBF1    (G) ELKRQRKQSNRESARRSRLRQAECEQOQRVESLSENNQSLRD
AtGBF2    (G) EVKREKQSNRESARRSRLRQAETEQSVKVDALVAENMSLRS
AtGBF3    (G) ELKRERKQSNRESARRSRLRQAEETEARKEVEALTAENMALRS
AtHY5     (H) ENKRLKRLLRNRVSAQQAREKRYLSEENRVKDELKNSELEE
AtHYH     (H) EYRSLKRLLRNRVSAQQAREKRYVSDLESRANLEQNNNDQLEA
AtbZIP18  (I) DPKRAKRIILANRQSAARSKERKARYILEERKVQTLQTEATTLA
AtbZIP29  (I) DPKRVKRIILANRQSAARSKERKARYIVEEHKVQTLQTEATTLA
AtbZIP30  (I) DPKRVKRIILANRQSAARSKERKARYIIEEHKVQTLQTEATTLA
AtbZIP31  (I) DPKEVRIILKNRESAARSKQKMLQYMINDELKINLENKNASIFE
AtbZIP32  (I) DPKEVRIILKNRESAARHLKQKMLQYMINDEHRINVENENASIFE
AtbZIP33  (I) DPKKVRRIILKNRESAARSKQKMLKYMIDEHRKIFLENKNALIFE
AtbZIP52  (I) DPKRAKRIILANRQSAARSKERKARYIQEERKVQTLQTEATTLA
AtbZIP69  (I) DPKRAKRIILANRQSAARSKERKARYIAIEERKVQTLQTEATTLA
AtbZIP71  (I) DPNEVKRIILNRLDTRSKQKSLYIVDEGSRVIRHVMVNTSLYG
AtbZIP74  (I) DAKKYRMLANRQSAARSKENREKIRDMELRVETENTQASLFG
AtPosF21  (I) DPKRAKRIILANRQSAARSKERKARYIFIEERKVQTLQTEATTLA
AtVIP1    (I) DPKRAKRIILANRQSAARSKERKARYITGIEERKVQTLQTEATTLA
AtbZIP62  (J) EERRIRRIILANRESARQTIIRQAMCEESKKAADTYENENRRR
AtbZIP60  (K) VAKKRRRVRNRDAVRSREKKEYVQDEKKSKEYERECLELGR
AtbZIP76  (L) TYEADNTKRAKQFFAQRSRVRKLYISEERNVQTLQAEKGSVSA
AtbZIP77  (L) PGSKTDSKRIKHQNAHRAFLRLLEYLSDERTIQVLQVEGCEMSS
AtbZIP78  (L) ATSEADTKRAKQFFAQRSRVRKIQYIAIEERNVQTL-----
AtbZIP1   (S) DEKKRRKLSNRESARRSRLKQOKLMEDTIEISSERRIKENSE
AtbZIP3   (S) NERKQRMIKNNRESARRSRMRKQRHLDELSQVAVLRSENHQLLD
AtbZIP4   (S) DDKKRRRTISNRESARRSRMRKQKRFEEETEENRNLNIRNQELKN
AtbZIP5   (S) DERKKRRKLSNRESARRSREKQKHLLEMSIQLNQLKIQNQLKN
AtbZIP6   (S) DDRKRRKMSNRESARRSRMRKQRHIDNPKDEANRGLNRELAN
AtbZIP7   (S) DERKKRRKMSNRESARRSRMRKQRHIDNREOVNRLDENRELG
AtbZIP8   (S) NERKRRKVSNNRESARRSRMRKQRHMEELWSMLVQLINKKSLVD
AtbZIP42  (S) NERKQRMIKNNRESARRSRMRKQRHLDELSQVAVLRSENHQLLD
AtbZIP43  (S) NERKQRKISNRESARRSRMRKQRQVDELSQVAVLRDENHQLLR
AtbZIP44  (S) DERKKRRKQSNRESARRSRMRKQRHLDDTAQVTHLRKENAQIVA
AtbZIP48  (S) DERKQRMLSNRESARRSRMRKQRHLDELSQVAVLRNENNCID
AtbZIP53  (S) DERKKRRMISNRESARRSRMRKQKQLGDLINVTLLKNDNAKITE
AtbZIP58  (S) DERKQRMIKNNRESARRSRMRKQRHLDELSQVAVLRRTDNHCLMD
AtbZIP70  (S) EERRARRMVSNNRESARRSRMRKQKQIEEQQQVEQLMMLNHLSE
AtbZIP75  (S) EEKRLRRMASNRESARRSRMRERMMEKELQMQVKQLMAYNQFLYN
AtGBF5    (S) DERKKRRMLSNRESARRSRMRKQKHVDDTAQINQLSNDNRQILN
AtGBF6    (S) EQRKRRMLSNRESARRSRMRKQKLLDDTAQVNHKKENTEIVT
AtbZIP72  (S) DPKILKRIILSNRVAQRSRWKKVQYLDLAVKRSMEQREVSELRS
    
```

bZIP consensus                      N---X7--R---X9---L--X6--L--X6--L

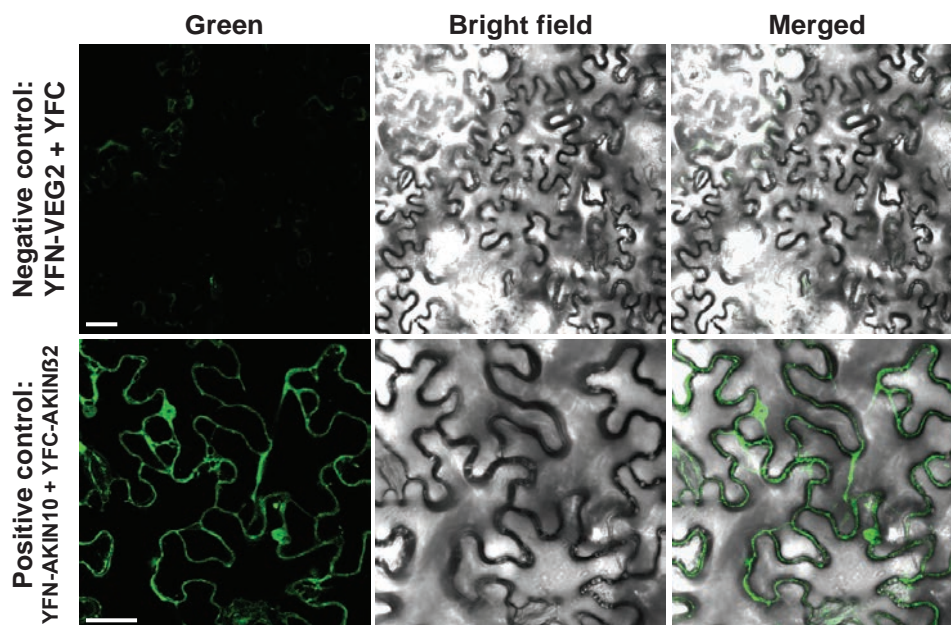

**Supplemental Figure 10: Positive and negative BiFC controls.**

Negative control comprising VEG2 fused to the N-terminal half of YFP (YFN-VEG2) co-expressed with the C-terminal half of YFP (YFC), and positive control with co-expression of constructs for a known interaction (Belda-Palazón et al., 2012). Photographs from left to right comprise the green channel image showing fluorescence of YFP, the bright field image and the merged YFP fluorescence and bright field images. Scale bars indicate 40 $\mu$ m.

**Supplemental Table 1: Mapping locus details.**

For mapping of *VEG2/FDa* and flanking genes for Supplemental Figure 6, existing morphological markers were supplemented with newly designed molecular markers targeted to introns of pea orthologs of genes identified in the relevant interval of the *Medicago truncatula* genome at Phytozome (phytozome.jgi.doe.gov; Goodstein et al., 2012). For cleaved amplified polymorphic sequence (CAPS) markers, the relevant restriction enzyme is shown in parentheses. The *VEG2* locus was mapped separately to, but later found to correspond to *FDa*. Populations are as follows: a, *veg2-2* x Solara; b, NGB5839 x JI1794.

| Name                                  | Marker type     | Population | Primers                                                       | Tm (°C) | Accession number(s)             | Corresponding Medicago locus (Mt4.0) |
|---------------------------------------|-----------------|------------|---------------------------------------------------------------|---------|---------------------------------|--------------------------------------|
| F-box SKIP31-like protein (F-box)     | HRM             | b          | TGGAGCCCGATTTTGTAAG<br>ATTATCTCCAAAAGGAAGAAAGC                | 55      | KP751411;<br>GAMJ01003933       | Medtr5g025560                        |
| LA RELATED PROTEIN 1C (LARP1C)        | HRM             | b          | CCGACTGTGCCCCAGTTGCTTTCT<br>CCATGCAACTTCTTCAGGTC              | 55      | JI919144, JI924790,<br>JR963915 | Medtr5g022790                        |
| FDa                                   | CAPS (BspHI)    | a          | GATCATTTTCCCTTCGACACTC<br>GGGAAAGATTCACAACCACAA               | 60      | KP739949;<br>KP739950           | Medtr5g022780                        |
|                                       | HRM             | b          | GCGGTAATCATTTTCGTACTCA<br>TGTTTGGTGGGATAGGGCAATGTG            | 55      |                                 |                                      |
| VEG2                                  | Morphological   | a          | -                                                             | -       |                                 |                                      |
| RING-H2 finger protein (RING-H2)      | HRM             | b          | TTAATTGGCCTGGAAGAGGA<br>CATGCGAACAAGGAAGAACA                  | 55      | KP739948                        | Medtr5g022770                        |
| Protein of unknown function (DUF343)  | HRM             | b          | AGATGAAGATGCATCAAACCAGA<br>GGAAGAGTGAGGGGAGGGCAACA            | 55      | JI907170                        | Medtr5g022760                        |
| Ferredoxin-NADP reductase (FENR1)     | CAPS (HpyCh4IV) | a, b       | ATGCTTATGCCAAAAGATCCTAATGC<br>CTCTGCTTACAGCAAAGTCAAGCCTGAAGTT | 60      | X12446                          | Medtr5g022300                        |
| Protein of unknown function (DUF726)  | Size            | b          | GCTGCATTGCTTTCAGCTAC<br>CTCTTGCTCCAAGTGAGTAACC                | 56      | JI945542                        | Medtr5g021430                        |
| APETALA3 (AP3)                        | CAPS (PsiI)     | b          | TGGGGGATATTGATCTGTGG<br>TCAAGCATTTTCTGCAGCCACACA              | 55      | JN412098                        | Medtr5g021270                        |
| Glutaredoxin (GRX)                    | HRM             | b          | TTCAGTTTCCGCTTTCGTTT<br>TGATCCACCAATATGCTTCC                  | 55      | JI899180                        | Medtr5g021090                        |
| Protein of unknown function (DUF1230) | HRM             | b          | TTCTTCATTAAGCAACAAGCAA<br>CCGAGCTAGGATCTGC AAAA               | 55      | GAMJ01037230                    | Medtr5g016100                        |
| AFILA (AF)                            | Morphological   | a          | -                                                             | -       | -                               | Medtr5g014400                        |
| STAY-GREEN (I;SGR)                    | Morphological   | a          | -                                                             | -       | AB303331;<br>AM884277           | Medtr5g011120                        |

**Supplemental Table 2: Details of sequences for FD proteins and related bZIP transcription factors used for phylogenetic analyses and alignments.**

Asterisks indicate that an altered annotation was used (putative intron sequence was removed or annotation of exons was corrected based on transcript sequence or alignments between species). Where relevant, previous gene names are indicated. Sequences were obtained from GenBank ([www.ncbi.nlm.nih.gov](http://www.ncbi.nlm.nih.gov)), Phytozome ([phytozome.jgi.doe.gov](http://phytozome.jgi.doe.gov); Goodstein et al., 2012), or alternative sources as indicated.

| Species                                | Gene name          | Accession number | Source                                                                         | Reference(s)                 |
|----------------------------------------|--------------------|------------------|--------------------------------------------------------------------------------|------------------------------|
| <i>Actinidia chinensis</i> (kiwifruit) | AcFD               | AGK89941         | GenBank                                                                        | Varkonyi-Gasic et al. (2013) |
| <i>Aquilegia coerulea</i>              | AqucaFD            | Aquca_075_00022* | <i>Aquilegia coerulea</i> Genome Sequencing Project assembly v1.1 at Phytozome | This study                   |
| <i>Arabidopsis thaliana</i>            | AtABF1 (AtbZIP35)  | NP_564551        | GenBank                                                                        | Jakoby et al. (2002)         |
|                                        | AtABF2 (AtbZIP36)  | NP_849777        |                                                                                |                              |
|                                        | AtABF3 (AtbZIP37)  | NP_567949        |                                                                                |                              |
|                                        | AtABF4 (AtbZIP38)  | NP_566629        |                                                                                |                              |
|                                        | AtABI5 (AtbZIP39)  | NP_565840        |                                                                                |                              |
|                                        | AtAHP1B (AtbZIP20) | NP_196312        |                                                                                |                              |
|                                        | AtAREB3 (AtbZIP66) | NP_191244        |                                                                                |                              |
|                                        | AtbZIP1            | NP_199756        |                                                                                |                              |
|                                        | AtbZIP3            | NP_197087        |                                                                                |                              |
|                                        | AtbZIP4            | NP_176162        |                                                                                |                              |
|                                        | AtbZIP5            | NP_566925        |                                                                                |                              |
|                                        | AtbZIP6            | NP_179870        |                                                                                |                              |
|                                        | AtbZIP7            | NP_195487        |                                                                                |                              |
|                                        | AtbZIP8            | NP_177054        |                                                                                |                              |
|                                        | AtbZIP9            | NP_568457        |                                                                                |                              |
|                                        | AtbZIP13           | NP_199221        |                                                                                |                              |
|                                        | AtbZIP15           | NP_199105        |                                                                                |                              |
|                                        | AtbZIP16           | NP_850248        |                                                                                |                              |
|                                        | AtbZIP17           | NP_565946        |                                                                                |                              |
|                                        | AtbZIP18           | NP_181594        |                                                                                |                              |
|                                        | AtbZIP19           | NP_567974        |                                                                                |                              |
|                                        | AtbZIP21           | NP_563810        |                                                                                |                              |
|                                        | AtbZIP23           | NP_179268        |                                                                                |                              |
|                                        | AtbZIP24           | NP_190764        |                                                                                |                              |
|                                        | AtbZIP25           | NP_567003        |                                                                                |                              |
|                                        | AtbZIP28           | NP_187691        |                                                                                |                              |
|                                        | AtbZIP29           | NP_849520        |                                                                                |                              |
|                                        | AtbZIP30           | NP_179719        |                                                                                |                              |
|                                        | AtbZIP31           | NP_178956        |                                                                                |                              |
|                                        | AtbZIP32           | NP_178948        |                                                                                |                              |
|                                        | AtbZIP33           | NP_565355        |                                                                                |                              |
|                                        | AtbZIP34           | NP_565970        |                                                                                |                              |
|                                        | AtbZIP42           | NP_189674        |                                                                                |                              |
|                                        | AtbZIP43           | NP_198696        |                                                                                |                              |
| AtbZIP44                               | NP_177672          |                  |                                                                                |                              |
| AtbZIP48                               | NP_178489          |                  |                                                                                |                              |
| AtbZIP49                               | NP_191225          |                  |                                                                                |                              |
| AtbZIP50                               | NP_565162          |                  |                                                                                |                              |
| AtbZIP52                               | NP_172170          |                  |                                                                                |                              |
| AtbZIP53                               | NP_191801          |                  |                                                                                |                              |
| AtbZIP58                               | NP_172817          |                  |                                                                                |                              |
| AtbZIP60                               | NP_174998          |                  |                                                                                |                              |
| AtbZIP61                               | NP_191371          |                  |                                                                                |                              |
| AtbZIP62                               | NP_173381          |                  |                                                                                |                              |
| AtbZIP65                               | NP_850784          |                  |                                                                                |                              |
| AtbZIP68                               | NP_174494          |                  |                                                                                |                              |
| AtbZIP69                               | NP_172097          |                  |                                                                                |                              |
| AtbZIP70                               | NP_200891          |                  |                                                                                |                              |
| AtbZIP71                               | NP_180011          |                  |                                                                                |                              |
| AtbZIP72                               | NP_196333          |                  |                                                                                |                              |
| AtbZIP74                               | NP_850010          |                  |                                                                                |                              |

| Species                                    | Gene name           | Accession number                        | Source                                                                                                                                                                       | Reference(s)                                                           |
|--------------------------------------------|---------------------|-----------------------------------------|------------------------------------------------------------------------------------------------------------------------------------------------------------------------------|------------------------------------------------------------------------|
| <i>Arabidopsis thaliana</i><br>(continued) | AtbZIP75            | NP_850791                               | GenBank                                                                                                                                                                      | Jakoby et al. (2002);<br>Abe et al. (2005);<br>Wigge et al. (2005)     |
|                                            | AtbZIP76            | AAU94427                                |                                                                                                                                                                              |                                                                        |
|                                            | AtbZIP77            | AAM64869                                |                                                                                                                                                                              |                                                                        |
|                                            | AtbZIP78            | NP_849319                               |                                                                                                                                                                              |                                                                        |
|                                            | AtBZO2H1 (AtbZIP10) | NP_192173                               |                                                                                                                                                                              |                                                                        |
|                                            | AtBZO2H3 (AtbZIP63) | NP_568508                               |                                                                                                                                                                              |                                                                        |
|                                            | AtDPBF2 (AtbZIP67)  | NP_566870                               |                                                                                                                                                                              |                                                                        |
|                                            | AtDPBF4 (AtbZIP12)  | NP_850341                               |                                                                                                                                                                              |                                                                        |
|                                            | AtFD (AtbZIP14)     | BAC65864                                |                                                                                                                                                                              |                                                                        |
|                                            | AtFDP (AtbZIP27)    | CAD29861                                |                                                                                                                                                                              |                                                                        |
|                                            | AtGBF1 (AtbZIP41)   | NP_195391                               |                                                                                                                                                                              |                                                                        |
|                                            | AtGBF2 (AtbZIP54)   | NP_192021                               |                                                                                                                                                                              |                                                                        |
|                                            | AtGBF3 (AtbZIP55)   | NP_182150                               |                                                                                                                                                                              |                                                                        |
|                                            | AtGBF4 (AtbZIP40)   | NP_171893                               |                                                                                                                                                                              |                                                                        |
|                                            | AtGBF5 (AtbZIP2)    | NP_179408                               |                                                                                                                                                                              |                                                                        |
|                                            | AtGBF6 (AtbZIP11)   | NP_195185                               |                                                                                                                                                                              |                                                                        |
|                                            | AtHY5 (AtbZIP56)    | NP_568246                               |                                                                                                                                                                              |                                                                        |
|                                            | AtHYH (AtbZIP64)    | NP_850605                               |                                                                                                                                                                              |                                                                        |
|                                            | AtOBF (AtbZIP26)    | NP_196313                               |                                                                                                                                                                              |                                                                        |
|                                            | AtPAN (AtbZIP46)    | NP_177031                               |                                                                                                                                                                              |                                                                        |
| AtPosF21 (AtbZIP59)                        | NP_001031456        |                                         |                                                                                                                                                                              |                                                                        |
| AtTGA1 (AtbZIP47)                          | NP_851273           |                                         |                                                                                                                                                                              |                                                                        |
| AtTGA3 (AtbZIP22)                          | NP_564156           |                                         |                                                                                                                                                                              |                                                                        |
| AtTGA4 (AtbZIP57)                          | NP_196565           |                                         |                                                                                                                                                                              |                                                                        |
| AtTGA6 (AtbZIP45)                          | NP_566415           |                                         |                                                                                                                                                                              |                                                                        |
| AtVIP1 (AtbZIP51)                          | NP_564486           |                                         |                                                                                                                                                                              |                                                                        |
| <i>Brachypodium distachyon</i>             | BdFD1               | XP_003578537                            | GenBank                                                                                                                                                                      | Tsuji et al. (2013)                                                    |
|                                            | BdFD2               | XP_003563257                            |                                                                                                                                                                              |                                                                        |
|                                            | BdFD3               | XP_003570743                            |                                                                                                                                                                              |                                                                        |
| <i>Cucumis sativus</i> (cucumber)          | CsFD                | Cucsa.322810                            | <i>Cucumis sativus</i> genome v1 at Phytozome                                                                                                                                | This study                                                             |
| <i>Eucalyptus grandis</i>                  | EgFD                | Eucgr.J02482*                           | <i>Eucalyptus grandis</i> genome assembly v1.1 (Myburg et al., 2014) at Phytozome                                                                                            | This study                                                             |
| <i>Fragaria vesca</i> (strawberry)         | FvFD1               | mrna14556.1-v1.0-hybrid                 | <i>Fragaria vesca</i> genome v1.1 (Shulaev et al., 2011) at Phytozome                                                                                                        | Tsuji et al. (2013)                                                    |
|                                            | FvFD2               | mrna08566.1-v1.0-hybrid                 |                                                                                                                                                                              |                                                                        |
| <i>Glycine max</i> (soybean)               | GmFDa1              | Glyma01g36810*                          | Soybean genome v1.1 (Schmutz et al., 2010) at Phytozome                                                                                                                      | Jung et al. (2012); Tsuji et al. (2013); Nan et al. (2014); This study |
|                                            | GmFDa2              | not annotated; Chr11: 5997867-5996321   |                                                                                                                                                                              |                                                                        |
|                                            | GmFDb1 (GmFDL02)    | Glyma02g05100*                          |                                                                                                                                                                              |                                                                        |
|                                            | GmFDb2              | not annotated; Chr16: 26917990-26913770 |                                                                                                                                                                              |                                                                        |
|                                            | GmFdc1 (GmFDL04)    | Glyma04g02420                           |                                                                                                                                                                              |                                                                        |
|                                            | GmFdc2 (GmFDL0602)  | Glyma06g02470                           |                                                                                                                                                                              |                                                                        |
| <i>Gossypium raimondii</i> (cotton)        | GmFDL19             | Glyma19g30230                           | Cotton genome v2.1 (Paterson et al., 2012) at Phytozome                                                                                                                      | This study                                                             |
|                                            | GrFD1               | Gorai.003G007000                        |                                                                                                                                                                              |                                                                        |
|                                            | GrFD2               | Gorai.007G191800                        |                                                                                                                                                                              |                                                                        |
|                                            | GrFD3               | Gorai.009G192500                        |                                                                                                                                                                              |                                                                        |
|                                            | GrFD4               | Gorai.009G269300                        |                                                                                                                                                                              |                                                                        |
| <i>Hordeum vulgare</i> (barley)            | GrFD5               | Gorai.002G122200                        | GenBank                                                                                                                                                                      | Tsuji et al. (2013)                                                    |
|                                            | HvFD1               | BAK04622                                |                                                                                                                                                                              |                                                                        |
|                                            | HvFD2               | AK249012                                |                                                                                                                                                                              |                                                                        |
| <i>Lotus japonicus</i>                     | HvFD3               | AK359958                                | <i>Lotus japonicus</i> genome assembly build 2.5 (Sato et al., 2008) at Kazusa DNA Research Institute ( <a href="http://www.kazusa.or.jp/lotus">www.kazusa.or.jp/lotus</a> ) | This study                                                             |
|                                            | LjFDa               | chr2.CM0272.780.r2.m                    |                                                                                                                                                                              |                                                                        |
| <i>Malus domestica</i> (apple)             | MdFD1               | MDP0000169473*                          | <i>Malus domestica</i> genome v1.0 (Velasco et al., 2010) at Phytozome                                                                                                       | Tsuji et al. (2013)                                                    |
|                                            | MdFD2               | MDP0000636541*                          |                                                                                                                                                                              |                                                                        |



| Species                                    | Gene name                     | Accession number                           | Source                                                                                                                                         | Reference(s)                                          |
|--------------------------------------------|-------------------------------|--------------------------------------------|------------------------------------------------------------------------------------------------------------------------------------------------|-------------------------------------------------------|
| <i>Manihot esculenta</i><br>(cassava)      | MeFD1                         | cassava4.1_021397m*                        | Cassava genome v4.1<br>(Prochnik et al., 2012) at<br>Phytozome                                                                                 | This study                                            |
|                                            | MeFD2                         | cassava4.1_029555m*                        |                                                                                                                                                |                                                       |
|                                            | MeFD3                         | cassava4.1_023228m*                        |                                                                                                                                                |                                                       |
|                                            | MeFD4                         | cassava4.1_021412m*                        |                                                                                                                                                |                                                       |
| <i>Medicago truncatula</i>                 | MtFDa                         | Medtr5g022780*                             | <i>Medicago truncatula</i><br>Genome Project v3.5<br>(Young et al., 2011) at<br>Phytozome                                                      | Stanton-Geddes<br>et al. (2013);<br>This study        |
|                                            | MtFDb                         | Medtr8g075130*                             |                                                                                                                                                |                                                       |
|                                            | Medtr7g088090<br>(prev. MtFD) | Medtr7g088090                              |                                                                                                                                                |                                                       |
| <i>Musa acuminata</i><br>(banana)          | MaFD1                         | GSMUA_Achr1P02640_001*                     | The Banana Genome Hub<br>(banana-genome.cirad.fr;<br>D'Hont et al., 2012)                                                                      | Tsuji et al.<br>(2013); This<br>study                 |
|                                            | MaFD2                         | GSMUA_Achr5P11470_001*                     |                                                                                                                                                |                                                       |
|                                            | MaFD3                         | GSMUA_Achr9P24090_001*                     |                                                                                                                                                |                                                       |
|                                            | MaFD4                         | GSMUA_Achr9P21040_001                      |                                                                                                                                                |                                                       |
|                                            | MaFD5                         | GSMUA_Achr5P11220_001*                     |                                                                                                                                                |                                                       |
| <i>Oryza sativa</i><br>(rice)              | OsAREB3                       | LOC_Os05g41070                             | <i>Oryza sativa</i> genome,<br>MSU Release 7.0, Rice<br>Genome Annotation<br>Project<br>(rice.plantbiology.msu.edu<br>; Kawahara et al., 2013) | Tsuji et al.<br>(2013)                                |
|                                            | OsFD1                         | LOC_Os09g36910                             |                                                                                                                                                |                                                       |
|                                            | OsFD2                         | LOC_Os06g50600                             |                                                                                                                                                |                                                       |
|                                            | OsFD3                         | LOC_Os02g58670                             |                                                                                                                                                |                                                       |
|                                            | OsFD4                         | LOC_Os08g43600                             |                                                                                                                                                |                                                       |
|                                            | OsFD5                         | LOC_Os06g50830                             |                                                                                                                                                |                                                       |
|                                            | OsFD6                         | CT843963                                   |                                                                                                                                                |                                                       |
| <i>Phaseolus vulgaris</i><br>(common bean) | PvFDa                         | Phvul.002G105700*                          | <i>Phaseolus vulgaris</i><br>genome v1.0 (Schmutz et<br>al., 2014) at Phytozome                                                                | This study                                            |
|                                            | PvFDb                         | Phvul.003G266100                           |                                                                                                                                                |                                                       |
|                                            | PvFDc                         | Phvul.009G018700                           |                                                                                                                                                |                                                       |
| <i>Phoenix dactylifera</i><br>(date palm)  | PdFD1                         | PDK_30s1175071g003                         | Date palm draft genome<br>v3 (qatar-<br>weill.cornell.edu/research/<br>datepalmGenome; Al-<br>Dous et al., 2011)                               | Tsuji et al.<br>(2013)                                |
| <i>Pisum sativum</i><br>(pea)              | PsFDa                         | KP739950                                   | GenBank                                                                                                                                        | This study                                            |
| <i>Populus trichocarpa</i><br>(poplar)     | PtFD1                         | XP_002327643*                              | GenBank                                                                                                                                        | Tsuji et al.<br>(2013)                                |
|                                            | PtFD2                         | XP_002307742                               |                                                                                                                                                | This study                                            |
|                                            | PtFD3                         | XP_002300691                               |                                                                                                                                                |                                                       |
| <i>Prunus persica</i><br>(peach)           | PpFD1                         | ppa018386m*                                | Peach genome v1.0 (The<br>International Peach<br>Genome Initiative, 2013)<br>at Phytozome                                                      | This study                                            |
|                                            | PpFD2                         | ppa021354m*                                |                                                                                                                                                |                                                       |
| <i>Setaria italica</i><br>(foxtail millet) | SiFD1                         | Si031077m                                  | <i>Setaria italica</i> genome<br>v2.1 (Bennetzen et al.,<br>2012) at Phytozome                                                                 | Tsuji et al.<br>(2013)                                |
|                                            | SiFD2                         | Si007412m                                  |                                                                                                                                                |                                                       |
|                                            | SiFD3                         | Si023448m                                  |                                                                                                                                                |                                                       |
|                                            | SiFD4                         | Si014546m                                  |                                                                                                                                                |                                                       |
| <i>Solanum lycopersicum</i><br>(tomato)    | SISPGB                        | Solyc02g083520                             | Tomato genome ITAG2.3<br>(Tomato Genome<br>Consortium, 2012) at<br>Phytozome                                                                   | Pnueli et<br>al.(2001); Park<br>et al. (2014)         |
|                                            | SISPGB2                       | Solyc02g061990*                            |                                                                                                                                                |                                                       |
| <i>Solanum tuberosum</i><br>(potato)       | StFD1                         | not annotated;<br>Chr02:60345702..60350121 | <i>Solanum tuberosum</i><br>genome annotation v3.4<br>at Phytozome (Potato<br>Genome Sequencing<br>Consortium, 2011)                           | Tsuji et al.<br>(2013)                                |
|                                            | StFD2                         | PGSC0003DMP400041309                       |                                                                                                                                                |                                                       |
| <i>Sorghum bicolor</i>                     | SbFD1                         | XP_002460587                               | GenBank                                                                                                                                        | Tsuji et al.<br>(2013)                                |
|                                            | SbFD2                         | XP_002439039                               |                                                                                                                                                |                                                       |
|                                            | SbFD3                         | XP_002453108                               |                                                                                                                                                |                                                       |
| <i>Triticum aestivum</i><br>(wheat)        | TaFD1                         | CK206464                                   | GenBank                                                                                                                                        | Li and<br>Dubcovsky<br>(2008); Tsuji et<br>al. (2013) |
|                                            | TaFDL2                        | ABZ91908                                   |                                                                                                                                                |                                                       |
|                                            | TaFDL6                        | ABZ91910                                   |                                                                                                                                                |                                                       |
|                                            | TaFDL13                       | ABZ91911                                   |                                                                                                                                                |                                                       |
|                                            | TaFDL15                       | ABZ91912                                   |                                                                                                                                                |                                                       |
| <i>Vitis Vinifera</i><br>(grape)           | VvFD1                         | CBI19920                                   | GenBank                                                                                                                                        | Tsuji et al.<br>(2013)                                |
|                                            | VvFD2                         | XP_003635259                               |                                                                                                                                                |                                                       |
| <i>Zea mays</i><br>(maize)                 | ZmDLF1                        | NP_001105962                               | GenBank                                                                                                                                        | Muszynski et al.<br>(2006); Tsuji et<br>al. (2013)    |

Supplemental Table 3: Primer details.

| Gene                  | Purpose/details                                                                                                                                | Primer names             | Primer sequences (5' to 3')                         | Tm (°C) | Source              |
|-----------------------|------------------------------------------------------------------------------------------------------------------------------------------------|--------------------------|-----------------------------------------------------|---------|---------------------|
| <i>ACT</i>            | qRT-PCR                                                                                                                                        | PsACT-F<br>PsACT-R       | GTGTCTGGATTGGAGGATCAATC<br>GGCCACGCTCATATTTCA       | 59      | Foo et al. (2005)   |
| <i>AP3</i>            | qRT-PCR                                                                                                                                        | PsAP3-10F<br>PsAP3-6R    | TGGGGGATATTGATCTGTGG<br>TCCAAC TCCAAACCACCTTCACCT   | 60      | This study          |
| <i>DET (TFL1a)</i>    | qRT-PCR                                                                                                                                        | PsTFL1a-1F<br>PsTFL1a-2R | CGTTGGTAGAGTCATAGG<br>AGGATCACTAGGGCCAGG            | 58      | Hecht et al. (2011) |
| <i>FDa/VEG2</i>       | Full-length coding sequence for BiFC construct                                                                                                 | PsFD-7F<br>PsFD-5R       | ACCATGGAAGAGTTGTGGAAAG<br>GGGAAAGATTCACAACCACAA     | 60      | This study          |
|                       | qRT-PCR                                                                                                                                        | PsFD-6F<br>PsFD-3R       | ATTTGATCCAAACGTCGGTGT<br>ATCAACTTTTTGCTCCAGTTCCG    | 60      |                     |
|                       | <i>in situ</i> probe                                                                                                                           | PsFD-5F<br>PsFD-6R       | TTGCTGGAAGAGAATGCAAAG<br>TCATTCAC TTTCCGCATGAA      | 60      |                     |
|                       | PCR marker for isolation of full-length coding sequence for Figure 4D and <i>veg2-1</i> genotyping (presence/absence)                          | PsFD-7F<br>PsFD-6R       | ACCATGGAAGAGTTGTGGAAAG<br>TCATTCAC TTTCCGCATGAA     | 56      |                     |
|                       | CAPS marker (BspHI) for <i>veg2-2</i> genotyping                                                                                               | PsFD-4F<br>PsFD-5R       | GATCATTTTCCCTTCGACACTC<br>GGGAAAGATTCACAACCACAA     | 60      |                     |
|                       | PCR for fragment present in <i>veg2-1</i> for Figure 4D                                                                                        | PsFD-9F<br>PsFD-12R      | CGCAACTCATATCCGAAAGT<br>CATAAGGCAACATGCAATGG        | 58      |                     |
|                       | Attempted isolation of <i>FDa</i> from <i>veg2-1</i> . Primers were used in various combinations and are shown in order of location (5' → 3'). | PsFD-1F                  | GACTCTCTCTCCCCCAATCTCTT                             | 62      |                     |
|                       |                                                                                                                                                | PsFD-7F                  | ACCATGGAAGAGTTGTGGAAAG                              | 60      |                     |
|                       |                                                                                                                                                | PsFD-1R                  | GGCCGAGTGTTTAAACTGAGAGC                             | 62      |                     |
|                       |                                                                                                                                                | PsFD-3R                  | ATCAACTTTTTGCTCCAGTTCCG                             | 62      |                     |
|                       |                                                                                                                                                | PsFD-5F                  | TTGCTGGAAGAGAATGCAAAG                               | 60      |                     |
|                       |                                                                                                                                                | PsFD-5R                  | GGGAAAGATTCACAACCACAA                               | 60      |                     |
|                       |                                                                                                                                                | PsFD-6R                  | TCATTCAC TTTCCGCATGAA                               | 56      |                     |
| PsFD-7R               | TGCACTCATTTGTCATAGTTGG                                                                                                                         | 62                       |                                                     |         |                     |
| <i>FDb</i> (putative) | Attempted isolation. Primers were used in various combinations.                                                                                | FD-1D                    | ATGGAAGAAGTDTGGAAWGAHATHAAYC<br>TDKCTTC             | 60      | This study          |
|                       |                                                                                                                                                | FD-2D                    | CTAGCBCKKGAHCKWGCWGCAGAYTCYC<br>KRTTCTTGATCA        | 60      |                     |
|                       |                                                                                                                                                | FD-3D                    | MGRGARTCTGCWGCWMDTMMGVGCT<br>AGRAARCAGG             | 60      |                     |
|                       |                                                                                                                                                | MiFDP-1F                 | GACGACATAAGCGAATAATGAA                              | 58      |                     |
|                       |                                                                                                                                                | MiFDP-1R                 | AGCTCTTGATCGTGACGAG                                 | 62      |                     |
|                       |                                                                                                                                                | MiFDP-2R                 | TGGAGCTGTTGATGTTCCGAT                               | 58      |                     |
| <i>FTa1</i>           | Full-length coding sequence for BiFC construct                                                                                                 | PsFTLa-9F<br>PsFTLa-4R   | CCACATATGGCAGGTAGTAGC<br>AGCGTCTGTAGTGTAACGTGT      | 60      | This study          |
|                       | qRT-PCR                                                                                                                                        | PsFTLa-6F<br>PsFTLa-2R   | GCCCAAGCAACCCTACTTTT<br>CCATCCTGGAGCGTAAACCC        | 60      | Hecht et al. (2011) |
| <i>FTa2</i>           | Full-length coding sequence for BiFC construct                                                                                                 | PsFTLb-5F<br>PsFTLb-R4   | ATGGCCTGTAGTAGCCGGAATCC<br>AGCACCATTGATGCAGTACC     | 60      | Hecht et al. (2011) |
| <i>FTb1</i>           | Full-length coding sequence for BiFC construct                                                                                                 | PsFTLe-2FF<br>PsFTLe-2R  | ATGCGTATGAAATCATCGAATCC<br>ATTATATGATCATCTCCTTCCACC | 62      | Hecht et al. (2011) |
| <i>FTb2</i>           | Full-length coding sequence for BiFC construct                                                                                                 | PsFTLe-2FF<br>PsFTLe2-1R | ATGCGTATGAAATCATCGAATCC<br>GGTGCATGGATATGTTTAGAC    | 60      | This study          |

| Gene               | Purpose/details                                        | Primer names             | Primer sequences (5' to 3')                           | Tm (°C) | Source                |
|--------------------|--------------------------------------------------------|--------------------------|-------------------------------------------------------|---------|-----------------------|
| <i>FTc</i>         | Full-length coding sequence for BiFC construct         | PsFTLc-9F<br>PsFTLc-3R   | ATGCCTAGGAATATGGTCGATCC<br>GAACTAACCCCGCCCACTTGG      | 60      | Hecht et al. (2011)   |
|                    | qRT-PCR                                                | PsFTLc-8F<br>PsFTLc-7R   | GATATTCCAGCCACAACAAGC<br>TTATGACGCCACTCTGGAGCAA       | 62      |                       |
| <i>LARP1C</i>      | Isolation of full-length coding sequence for Figure 4D | PsWiHe-1F<br>PsHyp-1R    | TCATCATCGGAGAGTCATCG<br>TTCCCTCAGAGGCAGTAGGAAGC       | 55      | This study            |
| <i>LF (TFL1c)</i>  | qRT-PCR                                                | PsLF-CR2<br>PsLF-CR3     | AAATAAGCAGCAGCAACAGGG<br>CAGACATTCCAGGGACAACAG        | 60      | Foucher et al. (2003) |
| <i>PIM</i>         | CAPS marker (XmnI) for <i>pim-2</i> genotyping         | PsPIM-F1<br>PsPIM-R1     | ACCTCTTAACATTCTTTGG<br>AAGTGAAGAAAAGAGAATATA          | 50      | This study            |
|                    | qRT-PCR                                                | PsPIM-4F<br>PsPIM-6R     | GCTTCAGAGTTTGAACAGC<br>GACTCCATGGTGGTTTGG             | 58      | Hecht et al. (2011)   |
| <i>RING-H2</i>     | Isolation of full-length coding sequence for Figure 4D | PsZnFin-5F<br>PsZnFin-3R | ACCACCCTTCCAAACCAAG<br>CCATAGGCTGTGGTGGATTT           | 58      | This study            |
| <i>SEP1</i>        | qRT-PCR                                                | PsPM6-7F<br>PsPM6-8R     | GATTGCCTGACTGATTTTCG<br>TTGTTGAGCTTGACTTGTGG          | 60      | Hecht et al. (2011)   |
| <i>SOC1a</i>       | qRT-PCR                                                | PsSOC1a-Q1<br>PsSOC1a-Q2 | GAGTGTAAAGCACTGTTAGAGCAAG<br>TCTCGGATGATCATTTGGCGGTGG | 65      | This study            |
| <i>UNI</i>         | qRT-PCR                                                | PsUNI-1F<br>PsUNI-2R     | CATCAGAGCTGAAAGAAGG<br>GCTTCCTTTTCACGTTGC             | 55      | Hecht et al. (2011)   |
| <i>VEG1 (FULc)</i> | qRT-PCR and <i>veg1</i> genotyping (presence/absence)  | PsFULc-2F<br>PsFULc-2R   | CGATGCCTTGAAACCATAGG<br>AATCCAATGACCCTCTTGC           | 58      | Berbel et al. (2012)  |

**Supplemental Table 4: Details for *FD* and flanking genes in *Arabidopsis* and legume species.**

This table accompanies Figure 4B and Supplemental Figure 8. Details in this table are based on genome builds for *Arabidopsis* (TAIR10) from The Arabidopsis Information Resource ([www.arabidopsis.org](http://www.arabidopsis.org)), and *Medicago* (Mt3.5), common bean (*Phvulv* v1.0), and soybean (*Glyma* v1.1) from Phytozome ([www.phytozome.net](http://www.phytozome.net)). Single asterisks indicate incorrect annotation in online resources, as determined by alignments with expressed sequences and between legume species, which was corrected for the purposes of this study. Where possible, genes are named according to the closest related *Arabidopsis* homolog.

| Species                                                                             | Chromosome | Symbol                                                                              | Gene           | Locus ID          | Chromosomal location |
|-------------------------------------------------------------------------------------|------------|-------------------------------------------------------------------------------------|----------------|-------------------|----------------------|
| <i>Arabidopsis thaliana</i>                                                         | At4        |    | <i>LARP1C</i>  | AT4G35890         | 16997139-17000833    |
|                                                                                     |            |    | <i>FD</i>      | AT4G35900         | 17004595-17006287    |
|                                                                                     |            |    | <i>DUF343</i>  | AT4G35905         | 17007028-17008154    |
| <i>Medicago truncatula</i>                                                          | Mt5        |    | <i>LARP1C</i>  | Medtr5g022790*    | 8775734-8771155      |
|                                                                                     |            |    | <i>FDa</i>     | Medtr5g022780*    | 8758327-8759707      |
|                                                                                     |            |    | <i>RING-H2</i> | Medtr5g022770*    | 8754049-8754848      |
|                                                                                     |            |    | <i>DUF343</i>  | Medtr5g022760     | 8749173-8751848      |
|                                                                                     | Mt8        |    | <i>LARP1C</i>  | Medtr8g075120     | 20220967-20223420    |
|                                                                                     |            |    | <i>FDb</i>     | Medtr8g075130*    | 20225953-20227169    |
|  |            | <i>EMB3006</i>                                                                      | Medtr8g075140  | 20228872-20234066 |                      |
| Common bean ( <i>Phaseolus vulgaris</i> )                                           | Pv2        |  | <i>LARP1C</i>  | Phvul.002G105500  | 21244748-21249771    |
|                                                                                     |            |  | <i>FDa</i>     | Phvul.002G105700* | 21293640-21294548    |
|                                                                                     |            |  | <i>RING-H2</i> | Phvul.002G105800  | 21312952-21315712    |
|                                                                                     |            |  | <i>DUF343</i>  | Phvul.002G105900  | 21317735-21322244    |
|                                                                                     | Pv3        |  | <i>LARP1C</i>  | Phvul.003G266200  | 49298693-49303027    |
|                                                                                     |            |  | <i>FDb</i>     | Phvul.003G266100  | 49289696-49290831    |
|                                                                                     |            |  | <i>EMB3006</i> | Phvul.003G266000  | 49272428-49285826    |
|                                                                                     | Pv9        |  | <i>LARP1C</i>  | Phvul.009G018800  | 3474640-3480559      |
|                                                                                     |            |  | <i>FDc</i>     | Phvul009G018700   | 3423224-3427367      |
|                                                                                     |            |  | <i>SBT5.2</i>  | Phvul.009G018600  | 3474640-3480559      |

|                                                                                     |      |                                                                                     |                                |                   |                   |
|-------------------------------------------------------------------------------------|------|-------------------------------------------------------------------------------------|--------------------------------|-------------------|-------------------|
| Soybean<br>( <i>Glycine max</i> )                                                   | Gm1  |    | <i>LARP1C</i>                  | Glyma01g36801     | 49220680-49225998 |
|                                                                                     |      |    | <i>FDa1</i>                    | Glyma01g36810*    | 49235180-49236798 |
|                                                                                     |      |    | <i>RING-H2</i>                 | Glyma01g36820     | 49253298-49254542 |
|                                                                                     |      |    | <i>DUF343</i>                  | Glyma01g36830     | 49256522-49258723 |
|                                                                                     | Gm2  |    | <i>LARP1C</i>                  | Glyma02g05090     | 4130098-4135052   |
|                                                                                     |      |    | <i>FDb1</i>                    | Glyma02g05100*    | 4139368-4140828   |
|                                                                                     |      |    | <i>EMB3006</i>                 | Glyma02g05110     | 4144145-4151509   |
|                                                                                     | Gm4  |    | <i>LARP1C</i>                  | Glyma04g02405     | 1673134-1678845   |
|                                                                                     |      |    | <i>FDc1</i>                    | Glyma04g02420     | 1680703-1683111   |
|                                                                                     |      |    | <i>SBT5.2</i>                  | Glyma04g02431     | 1696836-1699749   |
|                                                                                     | Gm6  |    | <i>LARP1C</i>                  | Glyma06g02460     | 1632699-1637471   |
|                                                                                     |      |    | <i>FDc2</i>                    | Glyma06g02470     | 1639376-1641643   |
|                                                                                     |      |    | <i>SBT5.2</i>                  | Glyma06g02481     | 1654709-1659109   |
|                                                                                     | Gm11 |    | <i>LARP1C</i>                  | Glyma11g08500*    | 6008627-6013845   |
|                                                                                     |      |    | <i>FDa2</i>                    | Not annotated     | 5997867-5996321   |
|                                                                                     |      |  | <i>RING-H2</i>                 | Glyma11g08480*    | 5990036-5991373   |
|                                                                                     |      |  | <i>DUF343</i>                  | Glyma11g08470     | 5986226-5987561   |
|                                                                                     | Gm16 |  | <i>LARP1C</i>                  | Glyma16g23170     | 26890147-26894598 |
|                                                                                     |      |  | Histone methyltransferase gene | Glyma16g23191     | 26899881-26901749 |
|                                                                                     |      |  | <i>FDb2</i>                    | Not annotated     | 26917990-26913770 |
|  |      | Major facilitator superfamily gene                                                  | Glyma16g23210                  | 26920731-26925063 |                   |
|  |      | <i>EMB3006</i>                                                                      | Glyma16g23220                  | 26939014-26946253 |                   |

## Supplemental References

- Abe, M., Kobayashi, Y., Yamamoto, S., Daimon, Y., Yamaguchi, A., Ikeda, Y., Ichinoki, H., Notaguchi, M., Goto, K., and Araki, T. (2005). FD, a bZIP Protein Mediating Signals from the Floral Pathway Integrator FT at the Shoot Apex. *Science* **309**, 1052-1056.
- Al-Dous, E.K., George, B., Al-Mahmoud, M.E., Al-Jaber, M.Y., Wang, H., Salameh, Y.M., Al-Azwani, E.K., Chaluvadi, S., Pontaroli, A.C., DeBarry, J., Arondel, V., Ohlrogge, J., Saie, I.J., Suliman-Elmeer, K.M., Bennetzen, J.L., Kruegger, R.R., and Malek, J.A. (2011). De novo genome sequencing and comparative genomics of date palm (*Phoenix dactylifera*). *Nature Biotechnology* **29**, 521-527.
- Belda-Palazón, B., Ruiz, L., Martí, E., Tárraga, S., Tiburcio, A.F., Culiáñez, F., Farràs, R., Carrasco, P., and Ferrando, A. (2012). Aminopropyltransferases Involved in Polyamine Biosynthesis Localize Preferentially in the Nucleus of Plant Cells. *PLoS One* **7**, e46907.
- Bennetzen, J.L., Schmutz, J., Wang, H., Percifield, R., Hawkins, J., Pontaroli, A.C., Estep, M., Feng, L., Vaughn, J.N., Grimwood, J., Jenkins, J., Barry, K., Lindquist, E., Hellsten, U., Deshpande, S., Wang, X., Wu, X., Mitros, T., Triplett, J., Yang, X., Ye, C.-Y., Mauro-Herrera, M., Wang, L., Li, P., Sharma, M., Sharma, R., Ronald, P.C., Panaud, O., Kellogg, E.A., Brutnell, T.P., Doust, A.N., Tuskan, G.A., Rokhsar, D., and Devos, K.M. (2012). Reference genome sequence of the model plant *Setaria*. *Nature Biotechnology* **30**, 555-561.
- Berbel, A., Ferrándiz, C., Hecht, V., Dalmais, M., Lund, O.S., Susmilch, F.C., Taylor, S.A., Bendahmane, A., Ellis, T.H.N., Beltrán, J.P., Weller, J.L., and Madueño, F. (2012). *VEGETATIVE1* is essential for development of the compound inflorescence in pea. *Nature Communications* **3**, 797.
- Beveridge, C.A., and Murfet, I.C. (1996). The *gigas* mutant in pea is deficient in the floral stimulus. *Physiologia Plantarum* **96**, 637-645.
- Corrêa, L.G.G., Riaño-Pachón, D.M., Schrago, C.G., dos Santos, R.V., Mueller-Roeber, B., and Vincentz, M. (2008). The role of bZIP transcription factors in green plant evolution: adaptive features emerging from four founder genes. *PLoS One* **3**, e2944.
- D'Hont, A., Denoeud, F., Aury, J.-M., Baurens, F.-C., Carreel, F., Garsmeur, O., Noel, B., Bocs, S., Droc, G., Rouard, M., Da Silva, C., Jabbari, K., Cardi, C., Poulain, J., Souquet, M., Labadie, K., Jourda, C., Lengelle, J., Rodier-Goud, M., Alberti, A., Bernard, M., Correa, M., Ayyampalayam, S., McKain, M.R., Leebens-Mack, J., Burgess, D., Freeling, M., Mbeguie-A-Mbeguie, D., Chabannes, M., Wicker, T., Panaud, O., Barbosa, J., Hribova, E., Heslop-Harrison, P., Habas, R., Rivallan, R., Francois, P., Poirion, C., Kilian, A., Burthia, D., Jenny, C., Bakry, F., Brown, S., Guignon, V., Kema, G., Dita, M., Waalwijk, C., Joseph, S., Dievart, A., Jaillon, O., Leclercq, J., Argout, X., Lyons, E., Almeida, A., Jeridi, M., Dolezel, J., Roux, N., Risterucci, A.-M., Weissenbach, J., Ruiz, M., Glaszmann, J.-C., Quetier, F., Yahiaoui, N., and Wincker, P. (2012). The banana (*Musa acuminata*) genome and the evolution of monocotyledonous plants. *Nature* **488**, 213-217.
- Foo, E., Bullier, E., Goussot, M., Foucher, F., Rameau, C., and Beveridge, C.A. (2005). The Branching Gene *RAMOSUS1* Mediates Interactions among Two Novel Signals and Auxin in Pea. *The Plant Cell* **17**, 464-474.
- Foucher, F., Morin, J., Courtiade, J., Cadioux, S., Ellis, N., Banfield, M.J., and Rameau, C. (2003). *DETERMINATE* and *LATE FLOWERING* Are Two *TERMINAL FLOWER1/CENTRORADIALIS* Homologs That Control Two Distinct Phases of Flowering Initiation and Development in Pea. *The Plant Cell* **15**, 2742-2754.
- Goodstein, D.M., Shu, S., Howson, R., Neupane, R., Hayes, R.D., Fazo, J., Mitros, T., Dirks, W., Hellsten, U., Putnam, N., and Rokhsar, D.S. (2012). Phytozome: a comparative platform for green plant genomics. *Nucleic Acids Research* **40**, D1178-D1186.
- Hecht, V., Laurie, R.E., Vander Schoor, J.K., Ridge, S., Knowles, C.L., Liew, L.C., Susmilch, F.C., Murfet, I.C., Macknight, R.C., and Weller, J.L. (2011). The Pea *GIGAS* Gene Is a *FLOWERING LOCUS T* Homolog Necessary for Graft-Transmissible Specification of Flowering but Not for Responsiveness to Photoperiod. *The Plant Cell* **23**, 147-161.
- Jakoby, M., Weisshaar, B., Dröge-Laser, W., Vicente-Carbajosa, J., Tiedemann, J., Kroj, T., and Parcy, F. (2002). bZIP transcription factors in *Arabidopsis*. *Trends in Plant Science* **7**, 106-111.
- Jung, C.-H., Wong, C.E., Singh, M.B., and Bhalla, P.L. (2012). Comparative Genomic Analysis of Soybean Flowering Genes. *PLoS One* **7**, e38250.
- Kawahara, Y., de la Bastide, M., Hamilton, J., Kanamori, H., McCombie, W., Ouyang, S., Schwartz, D., Tanaka, T., Wu, J., Zhou, S., Childs, K., Davidson, R., Lin, H., Quesada-Ocampo, L., Vaillancourt, B., Sakai, H., Lee, S., Kim, J., Numa, H., Itoh, T., Buell, C., and Matsumoto, T. (2013). Improvement

of the *Oryza sativa* Nipponbare reference genome using next generation sequence and optical map data. *Rice* **6**, 1-10.

- Li, C., and Dubcovsky, J. (2008). Wheat FT protein regulates *VRN1* transcription through interactions with FDL2. *The Plant Journal* **55**, 543-554.
- Muszynski, M.G., Dam, T., Li, B., Shirbroun, D.M., Hou, Z., Bruggemann, E., Archibald, R., Ananiev, E.V., and Danilevskaya, O.N. (2006). *delayed flowering1* Encodes a Basic Leucine Zipper Protein That Mediates Floral Inductive Signals at the Shoot Apex in Maize. *Plant Physiology* **142**, 1523-1536.
- Myburg, A.A., Grattapaglia, D., Tuskan, G.A., Hellsten, U., Hayes, R.D., Grimwood, J., Jenkins, J., Lindquist, E., Tice, H., Bauer, D., Goodstein, D.M., Dubchak, I., Poliakov, A., Mizrachi, E., Kullán, A.R.K., Hussey, S.G., Pinard, D., van der Merwe, K., Singh, P., van Jaarsveld, I., Silva-Junior, O.B., Togawa, R.C., Pappas, M.R., Faria, D.A., Sansaloni, C.P., Petroli, C.D., Yang, X., Ranjan, P., Tschaplinski, T.J., Ye, C.-Y., Li, T., Sterck, L., Vanneste, K., Murat, F., Soler, M., Clemente, H.S., Saidi, N., Cassan-Wang, H., Dunand, C., Hefer, C.A., Bornberg-Bauer, E., Kersting, A.R., Vining, K., Amarasinghe, V., Ranik, M., Naithani, S., Elser, J., Boyd, A.E., Liston, A., Spatafora, J.W., Dharmwardhana, P., Raja, R., Sullivan, C., Romanel, E., Alves-Ferreira, M., Kulheim, C., Foley, W., Carocha, V., Paiva, J., Kudrna, D., Brommonschenkel, S.H., Pasquali, G., Byrne, M., Rigault, P., Tibbits, J., Spokevicius, A., Jones, R.C., Steane, D.A., Vaillancourt, R.E., Potts, B.M., Joubert, F., Barry, K., Pappas, G.J., Strauss, S.H., Jaiswal, P., Grima-Pettenati, J., Salse, J., Van de Peer, Y., Rokhsar, D.S., and Schmutz, J. (2014). The genome of *Eucalyptus grandis*. *Nature* **510**, 356-362.
- Nan, H., Cao, D., Zhang, D., Li, Y., Lu, S., Tang, L., Yuan, X., Liu, B., and Kong, F. (2014). GmFT2a and GmFT5a Redundantly and Differentially Regulate Flowering through Interaction with and Upregulation of the bZIP Transcription Factor GmFDL19 in Soybean. *PLoS One* **9**, e97669.
- Park, S.J., Jiang, K., Tal, L., Yichie, Y., Gar, O., Zamir, D., Eshed, Y., and Lippman, Z.B. (2014). Optimization of crop productivity in tomato using induced mutations in the florigen pathway. *Nature Genetics* **46**, 1337-1342.
- Paterson, A.H., Wendel, J.F., Gundlach, H., Guo, H., Jenkins, J., Jin, D., Llewellyn, D., Showmaker, K.C., Shu, S., Udall, J., Yoo, M.-j., Byers, R., Chen, W., Doron-Faigenboim, A., Duke, M.V., Gong, L., Grimwood, J., Grover, C., Grupp, K., Hu, G., Lee, T.-h., Li, J., Lin, L., Liu, T., Marler, B.S., Page, J.T., Roberts, A.W., Romanel, E., Sanders, W.S., Szadkowski, E., Tan, X., Tang, H., Xu, C., Wang, J., Wang, Z., Zhang, D., Zhang, L., Ashrafi, H., Bedon, F., Bowers, J.E., Brubaker, C.L., Chee, P.W., Das, S., Gingle, A.R., Haigler, C.H., Harker, D., Hoffmann, L.V., Hovav, R., Jones, D.C., Lemke, C., Mansoor, S., Rahman, M.u., Rainville, L.N., Rambani, A., Reddy, U.K., Rong, J.-k., Saranga, Y., Scheffler, B.E., Scheffler, J.A., Stelly, D.M., Triplett, B.A., Van Deynze, A., Vaslin, M.F.S., Waghmare, V.N., Walford, S.A., Wright, R.J., Zaki, E.A., Zhang, T., Dennis, E.S., Mayer, K.F.X., Peterson, D.G., Rokhsar, D.S., Wang, X., and Schmutz, J. (2012). Repeated polyploidization of *Gossypium* genomes and the evolution of spinnable cotton fibres. *Nature* **492**, 423-427.
- Pierre, J.-B., Huguet, T., Barre, P., Huyghe, C., and Julier, B. (2008). Detection of QTLs for flowering date in three mapping populations of the model legume species *Medicago truncatula*. *Theoretical and Applied Genetics* **117**, 609-620.
- Pnueli, L., Gutfinger, T., Hareven, D., Ben-Naim, O., Ron, N., Adir, N., and Lifschitz, E. (2001). Tomato SP-interacting proteins define a conserved signaling system that regulates shoot architecture and flowering. *The Plant Cell* **13**, 2687-2702.
- Potato Genome Sequencing Consortium. (2011). Genome sequence and analysis of the tuber crop potato. *Nature* **475**, 189-195.
- Prochnik, S., Marri, P., Desany, B., Rabinowicz, P., Kodira, C., Mohiuddin, M., Rodriguez, F., Fauquet, C., Tohme, J., Harkins, T., Rokhsar, D., and Rounsley, S. (2012). The Cassava Genome: Current Progress, Future Directions. *Tropical Plant Biology* **5**, 88-94.
- Sato, S., Nakamura, Y., Kaneko, T., Asamizu, E., Kato, T., Nakao, M., Sasamoto, S., Watanabe, A., Ono, A., Kawashima, K., Fujishiro, T., Katoh, M., Kohara, M., Kishida, Y., Minami, C., Nakayama, S., Nakazaki, N., Shimizu, Y., Shinpo, S., Takahashi, C., Wada, T., Yamada, M., Ohmido, N., Hayashi, M., Fukui, K., Baba, T., Nakamichi, T., Mori, H., and Tabata, S. (2008). Genome Structure of the Legume, *Lotus japonicus*. *DNA Research* **15**, 227-239.
- Schmutz, J., McClean, P.E., Mamidi, S., Wu, G.A., Cannon, S.B., Grimwood, J., Jenkins, J., Shu, S., Song, Q., Chavarro, C., Torres-Torres, M., Geffroy, V., Moghaddam, S.M., Gao, D., Abernathy, B., Barry, K., Blair, M., Brick, M.A., Chovatia, M., Gepts, P., Goodstein, D.M., Gonzales, M., Hellsten, U., Hyten, D.L., Jia, G., Kelly, J.D., Kudrna, D., Lee, R., Richard, M.M.S., Miklas, P.N., Osorno, J.M., Rodrigues, J., Thareau, V., Urrea, C.A., Wang, M., Yu, Y., Zhang, M., Wing, R.A., Cregan, P.B.,

- Rokhsar, D.S., and Jackson, S.A.** (2014). A reference genome for common bean and genome-wide analysis of dual domestications. *Nature Genetics* **46**, 707-713.
- Schmutz, J., Cannon, S.B., Schlueter, J., Ma, J., Mitros, T., Nelson, W., Hyten, D.L., Song, Q., Thelen, J.J., Cheng, J., Xu, D., Hellsten, U., May, G.D., Yu, Y., Sakurai, T., Umezawa, T., Bhattacharyya, M.K., Sandhu, D., Valliyodan, B., Lindquist, E., Peto, M., Grant, D., Shu, S., Goodstein, D., Barry, K., Futrell-Griggs, M., Abernathy, B., Du, J., Tian, Z., Zhu, L., Gill, N., Joshi, T., Libault, M., Sethuraman, A., Zhang, X.-C., Shinozaki, K., Nguyen, H.T., Wing, R.A., Cregan, P., Specht, J., Grimwood, J., Rokhsar, D., Stacey, G., Shoemaker, R.C., and Jackson, S.A.** (2010). Genome sequence of the palaeopolyploid soybean. *Nature* **463**, 178-183.
- Shulaev, V., Sargent, D.J., Crowhurst, R.N., Mockler, T.C., Folkerts, O., Delcher, A.L., Jaiswal, P., Mockaitis, K., Liston, A., Mane, S.P., Burns, P., Davis, T.M., Slovin, J.P., Bassil, N., Hellens, R.P., Evans, C., Harkins, T., Kodira, C., Desany, B., Crasta, O.R., Jensen, R.V., Allan, A.C., Michael, T.P., Setubal, J.C., Celton, J.-M., Rees, D.J.G., Williams, K.P., Holt, S.H., Rojas, J.J.R., Chatterjee, M., Liu, B., Silva, H., Meisel, L., Adato, A., Filichkin, S.A., Troggio, M., Viola, R., Ashman, T.-L., Wang, H., Dharmawardhana, P., Elser, J., Raja, R., Priest, H.D., Bryant, D.W., Fox, S.E., Givan, S.A., Wilhelm, L.J., Naithani, S., Christoffels, A., Salama, D.Y., Carter, J., Girona, E.L., Zdepski, A., Wang, W., Kerstetter, R.A., Schwab, W., Korban, S.S., Davik, J., Monfort, A., Denoyes-Rothan, B., Arus, P., Mittler, R., Flinn, B., Aharoni, A., Bennetzen, J.L., Salzberg, S.L., Dickerman, A.W., Velasco, R., Borodovsky, M., Veilleux, R.E., and Folta, K.M.** (2011). The genome of woodland strawberry (*Fragaria vesca*). *Nature Genetics* **43**, 109-116.
- Singer, S.R., Hsiung, L.P., and Huber, S.C.** (1990). Determinate (*det*) mutant of *Pisum sativum* (Leguminosae: Papilionoideae) exhibits an indeterminate growth pattern. *American Journal of Botany* **77**, 1330-1335.
- Stanton-Geddes, J., Paape, T., Epstein, B., Briskine, R., Yoder, J., Mudge, J., Bharti, A.K., Farmer, A.D., Zhou, P., Denny, R., May, G.D., Erlandson, S., Yakub, M., Sugawara, M., Sadowsky, M.J., Young, N.D., and Tiffin, P.** (2013). Candidate Genes and Genetic Architecture of Symbiotic and Agronomic Traits Revealed by Whole-Genome, Sequence-Based Association Genetics in *Medicago truncatula*. *PLoS One* **8**, e65688.
- Taoka, K., Ohki, I., Tsuji, H., Furuita, K., Hayashi, K., Yanase, T., Yamaguchi, M., Nakashima, C., Purwestri, Y.A., Tamaki, S., Ogaki, Y., Shimada, C., Nakagawa, A., Kojima, C., and Shimamoto, K.** (2011). 14-3-3 proteins act as intracellular receptors for rice Hd3a florigen. *Nature* **476**, 332-335.
- Taylor, S.A., Hofer, J.M.I., Murfet, I.C., Sollinger, J.D., Singer, S.R., Knox, M.R., and Ellis, T.H.N.** (2002). *PROLIFERATING INFLORESCENCE MERISTEM*, a MADS-box gene that regulates floral meristem identity in pea. *Plant Physiology* **129**, 1150-1159.
- The International Peach Genome Initiative.** (2013). The high-quality draft genome of peach (*Prunus persica*) identifies unique patterns of genetic diversity, domestication and genome evolution. *Nature Genetics* **45**, 487-494.
- Tomato Genome Consortium.** (2012). The tomato genome sequence provides insights into fleshy fruit evolution. *Nature* **485**, 635-641.
- Tsuji, H., Nakamura, H., Taoka, K.-i., and Shimamoto, K.** (2013). Functional Diversification of FD Transcription Factors in Rice, Components of Florigen Activation Complexes. *Plant and Cell Physiology* **54**, 385-397.
- Varkonyi-Gasic, E., Moss, S.M.A., Voogd, C., Wang, T., Putterill, J., and Hellens, R.P.** (2013). Homologs of *FT*, *CEN* and *FD* respond to developmental and environmental signals affecting growth and flowering in the perennial vine kiwifruit. *New Phytologist* **198**, 732-746.
- Velasco, R., Zharkikh, A., Affourtit, J., Dhirra, A., Cestaro, A., Kalyanaraman, A., Fontana, P., Bhatnagar, S.K., Troggio, M., Pruss, D., Salvi, S., Pindo, M., Baldi, P., Castelletti, S., Cavaiuolo, M., Coppola, G., Costa, F., Cova, V., Dal Ri, A., Goremykin, V., Komjanc, M., Longhi, S., Magnago, P., Malacarne, G., Malnoid, M., Micheletti, D., Moretto, M., Perazzolli, M., Si-Ammour, A., Vezzulli, S., Zini, E., Eldredge, G., Fitzgerald, L.M., Gutin, N., Lanchbury, J., Macalma, T., Mitchell, J.T., Reid, J., Wardell, B., Kodira, C., Chen, Z., Desany, B., Niazi, F., Palmer, M., Koepke, T., Jiwan, D., Schaeffer, S., Krishnan, V., Wu, C., Chu, V.T., King, S.T., Vick, J., Tao, Q., Mraz, A., Stormo, A., Stormo, K., Bogden, R., Ederle, D., Stella, A., Vecchietti, A., Kater, M.M., Masiero, S., Lasserre, P., Lespinasse, Y., Allan, A.C., Bus, V., Chagne, D., Crowhurst, R.N., Gleave, A.P., Lavezzo, E., Fawcett, J.A., Proost, S., Rouze, P., Sterck, L., Toppo, S., Lazzari, B., Hellens, R.P., Durel, C.-E., Gutin, A., Bumgarner, R.E., Gardiner, S.E., Skolnick, M., Egholm, M., Van de Peer, Y., Salamini, F., and Viola, R.** (2010). The genome of the domesticated apple (*Malus x domestica* Borkh.). *Nature Genetics* **42**, 833-839.



- Wigge, P.A., Kim, M.C., Jaeger, K.E., Busch, W., Schmid, M., Lohmann, J.U., and Weigel, D.** (2005). Integration of Spatial and Temporal Information During Floral Induction in *Arabidopsis*. *Science* **309**, 1056-1059.
- Young, N.D., Debelle, F., Oldroyd, G.E.D., Geurts, R., Cannon, S.B., Udvardi, M.K., Benedito, V.A., Mayer, K.F.X., Gouzy, J., Schoof, H., Van de Peer, Y., Proost, S., Cook, D.R., Meyers, B.C., Spannagl, M., Cheung, F., De Mita, S., Krishnakumar, V., Gundlach, H., Zhou, S., Mudge, J., Bharti, A.K., Murray, J.D., Naoumkina, M.A., Rosen, B., Silverstein, K.A.T., Tang, H., Rombauts, S., Zhao, P.X., Zhou, P., Barbe, V., Bardou, P., Bechner, M., Bellec, A., Berger, A., Berges, H., Bidwell, S., Bisseling, T., Choisne, N., Couloux, A., Denny, R., Deshpande, S., Dai, X., Doyle, J.J., Dudez, A.-M., Farmer, A.D., Fouteau, S., Franken, C., Gibelin, C., Gish, J., Goldstein, S., Gonzalez, A.J., Green, P.J., Hallab, A., Hartog, M., Hua, A., Humphray, S.J., Jeong, D.-H., Jing, Y., Jocker, A., Kenton, S.M., Kim, D.-J., Klee, K., Lai, H., Lang, C., Lin, S., Macmil, S.L., Magdelenat, G., Matthews, L., McCorrison, J., Monaghan, E.L., Mun, J.-H., Najjar, F.Z., Nicholson, C., Noirot, C., O'Brien, M., Paule, C.R., Poulain, J., Prion, F., Qin, B., Qu, C., Retzel, E.F., Riddle, C., Sallet, E., Samain, S., Samson, N., Sanders, I., Saurat, O., Scarpelli, C., Schiex, T., Segurens, B., Severin, A.J., Sherrier, D.J., Shi, R., Sims, S., Singer, S.R., Sinharoy, S., Sterck, L., Viollet, A., Wang, B.-B., Wang, K., Wang, M., Wang, X., Warfsmann, J., Weissenbach, J., White, D.D., White, J.D., Wiley, G.B., Wincker, P., Xing, Y., Yang, L., Yao, Z., Ying, F., Zhai, J., Zhou, L., Zuber, A., Denarie, J., Dixon, R.A., May, G.D., Schwartz, D.C., Rogers, J., Quetier, F., Town, C.D., and Roe, B.A.** (2011). The *Medicago* genome provides insight into the evolution of rhizobial symbioses. *Nature* **480**, 520-524.
